# Supplementary material for: Head and pelvic movement asymmetries at trot in riding horses in training and perceived as free from lameness by the owner
Source: PLoS One. 2017 Apr 25;12(4):e0176253. doi: 10.1371/journal.pone.0176253 (PMC5404851; doi:10.1371/journal.pone.0176253)
Supplement: S1 Data — Excel sheet containing description of variables used for the analysis. Sheet ‘reduced_content_rowsred’ contains descriptions of the data and explanations of what the variable names mean. Sheet ‘data_rowsred’ contains the data. (XLSX) [file pone.0176253.s002.xlsx]

## Sheet: reduced_content_rowsred
	The SAS System
	The CONTENTS Procedure
	Data Set Name	WORK.ROWSRED1	Observations	483
	Member Type	DATA	Variables	81
	Engine	V9	Indexes	0
	Created	den 01 juli 2016 fredag kl 10:44	Observation Length	768
	Last Modified	den 01 juli 2016 fredag kl 10:44	Deleted Observations	0
	Protection		Compressed	NO
	Data Set Type		Sorted	NO
	Label
	Data Representation	WINDOWS_32
	Encoding	wlatin1 Western (Windows)
	Engine/Host Dependent Information
	Data Set Page Size	16384
	Number of Data Set Pages	24
	First Data Page	1							These data are for the 161 horses used in the analysis
	Max Obs per Page	21
	Obs in First Data Page	8
	Number of Data Set Repairs	0
	Filename	C:\Users\egenvall\AppData\Local\Temp\SAS Temporary Files\_TD7332_SLU005180_\rowsred1.sas7bdat
	Release Created	9.0301M0
	Host Created	W32_7PRO
	Alphabetic List of Variables and Attributes
	#	Variable	Type	Len	Format	Informat	Label		Specific explanation	Comment on analysis
	6	Gender	Char	8	$8.	$8.	Gender		horse gender	used in mixed model analysis
	7	Age	Num	8	BEST.		Age		horse age
	9	discipline	Char	21	$21.	$21.	discipline		horse discipline
	10	level	Char	13	$13.	$13.	level		horse level
	11	height	Char	6	$6.	$6.	height		horse height	used in mixed model analysis
	13	surfis	Char	6	$6.	$6.	surfis		surface: hard, soft
	15	Trial	Char	13	$13.	$13.	Trial		straight, left lungeing, right lungeing
	24	Fore_Lame_Left_Strides	Num	8	BEST.		Fore_Lame_Left_Strides		Number of lame left forelimb strides
	25	Fore_ame_Right_Strides	Num	8	BEST.		Fore_ame_Right_Strides		Number of lame right forelimb strides
	30	Fore_Diff_Min_Mean	Num	8	BEST.		Fore_Diff_Min_Mean		Hdmin (mean from lameness locator)
	31	Fore_Diff_Min_SD	Num	8	BEST.		Fore_Diff_Min_SD		standard deviation for Hdmin (mean)
	33	Fore_Diff_Max_Mean	Num	8	BEST.		Fore_Diff_Max_Mean		Hdmax (mean from lameness locator)
	34	Fore_Diff_Max_SD	Num	8	BEST.		Fore_Diff_Max_SD		standard deviation for Hdmax (mean)
	38	Hind_Lame_Left_Strides	Num	8	BEST.		Hind_Lame_Left_Strides		Number of lame left hindlimb strides
	39	Hind_Lame_Right_Strides	Num	8	BEST.		Hind_Lame_Right_Strides		Number of lame right hindlimb strides
	44	Hind_Diff_Min_Mean	Num	8	BEST.		Hind_Diff_Min_Mean		Pdmin (mean from lameness locator)
	45	Hind_Diff_Min_SD	Num	8	BEST.		Hind_Diff_Min_SD		standard deviation for Pdmin (mean)
	47	Hind_Diff_Max_Mean	Num	8	BEST.		Hind_Diff_Max_Mean		Pdmax (mean from lameness locator)
	48	Hind_Diff_Max_SD	Num	8	BEST.		Hind_Diff_Max_SD		standard deviation for Pdmax (mean)
	51	id	Num	8	BEST.		id		row id
	52	VS	Num	8	BEST.		VS		vector sum
	53	id_horse	Num	8					numeric id of horse
	54	str_fore_prop	Num	8					proportion right lame forestrides of all strides
	55	str_hind_prop	Num	8					proportion right lame hindstrides of all strides
	56	height1	Num	8					horse height
	57	age1	Num	8					horse age
	58	disc	Char	8					horse discipline	used in mixed model analysis
	59	disc1	Char	8					horse discipline
	60	level1	Char	8					horse level	used in mixed model analysis
	61	gender1	Char	8					horse gender	used in mixed model analysis
	62	gender11	Char	8					horse gender
	63	aHind_Diff_Min_Mean	Num	8					absolute value of Pdmin
	64	aHind_Diff_Max_Mean	Num	8					absolute value of Pdmax
	65	aFore_Diff_Min_Mean	Num	8					absolute value of Hdmin
	66	aFore_Diff_Max_Mean	Num	8					absolute value of Hdmax
	75	r25aHind_Diff_Min_Mean	Num	8					0.25 root of absolute value of Pdmin	response variable in mixed model analysis
	76	r25aHind_Diff_Max_Mean	Num	8					0.25 root of absolute value of Pdmax	response variable in mixed model analysis
	77	r25aFore_Diff_Min_Mean	Num	8					0.25 root of absolute value of Hdmin	response variable in mixed model analysis
	78	r25aFore_Diff_Max_Mean	Num	8					0.25 root of absolute value of Hdmax	response variable in mixed model analysis
	79	age11	Char	8					horse age in categories	used in mixed model analysis
	80	height111	Char	13					horse height in categories	used in mixed model analysis

## Sheet: data_rowsred
Gender	Age	discipline	level	height	surfis	Trial	Fore_Lame_Left_Strides	Fore_ame_Right_Strides	Fore_Diff_Min_Mean	Fore_Diff_Min_SD	Fore_Diff_Max_Mean	Fore_Diff_Max_SD	Hind_Lame_Left_Strides	Hind_Lame_Right_Strides	Hind_Diff_Min_Mean	Hind_Diff_Min_SD	Hind_Diff_Max_Mean	Hind_Diff_Max_SD	id	VS	id_horse	str_fore_prop	str_hind_prop	height1	age1	disc	disc1	level1	gender1	gender11	aHind_Diff_Min_Mean	aHind_Diff_Max_Mean	aFore_Diff_Min_Mean	aFore_Diff_Max_Mean	r25aHind_Diff_Min_Mean	r25aHind_Diff_Max_Mean	r25aFore_Diff_Min_Mean	r25aFore_Diff_Max_Mean	age11	height111
gelding	13	allround	novel	162	hard	Straight line	12	11	0.422681	23.1777	-5.88997	14.4366	2.5	20.5	5.2381	4.53527	5.80248	4.33193	392	5.90511	1	0.478261	0.891304	162	13	allround	allround	novel	gelding	gelding	5.2381	5.80248	0.422681	5.88997	1.51284	1.55204	0.806312	1.55786	age11_15	height155_163
gelding	13	allround	novel	162	soft	Lunge left	1	23	28.563	21.405	-1.53219	9.94446	23.5	5.5	-17.6927	3.77509	-2.99223	7.14396	393	28.6041	2	0.958333	0.189655	162	13	allround	allround	novel	gelding	gelding	17.6927	2.99223	28.563	1.53219	2.05092	1.31522	2.3118	1.11257	age11_15	height155_163
gelding	13	allround	novel	162	soft	Lunge right	8	23	8.61558	11.9261	8.63726	9.09512	12	25	15.1519	4.0079	-2.8222	4.87093	394	12.1996	3	0.741935	0.675676	162	13	allround	allround	novel	gelding	gelding	15.1519	2.8222	8.61558	8.63726	1.97295	1.29612	1.71325	1.71433	age11_15	height155_163
gelding	10	dressage	advanced	170	hard	Straight line	24	28	-5.65817	32.2739	3.90593	40.8984	2.5	50.5	4.56002	2.99315	10.9302	3.88126	278	6.8754	7	0.538462	0.95283	170	10	dressage	dressage	advanced	gelding	gelding	4.56002	10.9302	5.65817	3.90593	1.46131	1.81826	1.5423	1.40582	age6_10	height163_171
gelding	10	dressage	advanced	170	soft	Lunge right	10	13	3.3932	13.8997	12.2998	20.041	1	26	15.0694	4.0178	4.81162	4.15384	279	12.7593	8	0.565217	0.962963	170	10	dressage	dressage	advanced	gelding	gelding	15.0694	4.81162	3.3932	12.2998	1.97026	1.48106	1.35723	1.87273	age6_10	height163_171
gelding	10	dressage	advanced	170	soft	Lunge left	4	29	21.198	16.9388	-15.5809	25.5056	16	16	-8.83943	2.71003	8.8006	3.73041	280	26.3082	9	0.878788	0.5	170	10	dressage	dressage	advanced	gelding	gelding	8.83943	8.8006	21.198	15.5809	1.72427	1.72238	2.14572	1.98677	age6_10	height163_171
gelding	9	dressage	intermediate	170	soft	Lunge left	32	15	-2.50304	5.47561	5.54652	6.99662	9.5	37.5	2.37208	2.41999	1.16332	2.21932	659	6.08515	10	0.319149	0.797872	170	9	dressage	dressage	intermed	gelding	gelding	2.37208	1.16332	2.50304	5.54652	1.24103	1.03854	1.25782	1.53464	age6_10	height163_171
gelding	9	dressage	intermediate	170	soft	Lunge right	49	1	-12.484	9.40852	-8.69965	6.44873	14	36	4.61615	2.34387	-0.0876611	2.04198	660	15.2162	11	0.02	0.72	170	9	dressage	dressage	intermed	gelding	gelding	4.61615	0.0876611	12.484	8.69965	1.46578	0.544129	1.8797	1.71742	age6_10	height163_171
gelding	9	dressage	intermediate	170	hard	Straight line	12	14	0.529098	12.6891	-6.57415	17.7663	7.5	18.5	3.90671	2.28311	0.521213	3.30562	661	6.59541	12	0.538462	0.711538	170	9	dressage	dressage	intermed	gelding	gelding	3.90671	0.521213	0.529098	6.57415	1.40589	0.849677	0.852872	1.60125	age6_10	height163_171
mare	9	allround	novel	163	hard	Straight line	9	16	4.78092	10.3261	7.76884	7.05502	15	10	-5.24916	3.68691	1.3053	2.58304	194	9.12207	16	0.64	0.4	163	9	allround	allround	novel	mare	mare	5.24916	1.3053	4.78092	7.76884	1.51364	1.06888	1.47869	1.66951	age6_10	height163_171
mare	9	allround	novel	163	soft	Lunge right	1	42	16.1926	7.29706	-4.04551	6.98151	18	24	4.81951	2.72501	-1.60174	2.6195	195	16.6903	17	0.976744	0.571429	163	9	allround	allround	novel	mare	mare	4.81951	1.60174	16.1926	4.04551	1.48167	1.12499	2.00599	1.41822	age6_10	height163_171
mare	9	allround	novel	163	soft	Lunge left	26	32	3.40956	8.83137	9.34743	7.75502	31.5	25.5	-15.1595	4.19117	4.61819	3.37507	196	9.94985	18	0.551724	0.447368	163	9	allround	allround	novel	mare	mare	15.1595	4.61819	3.40956	9.34743	1.9732	1.46595	1.35886	1.74853	age6_10	height163_171
gelding	9	showjumping	intermediate	165	hard	Straight line	26	23	-1.36307	6.30103	0.534178	5.09762	3.5	45.5	1.90935	1.96369	5.15493	2.16563	542	1.464	22	0.469388	0.928571	165	9	showjump	showjump	intermed	gelding	gelding	1.90935	5.15493	1.36307	0.534178	1.1755	1.5068	1.08051	0.854912	age6_10	height163_171
gelding	9	showjumping	intermediate	165	soft	Lunge right	35	16	-3.0399	6.08724	3.95815	5.80475	2.5	46.5	3.87341	1.88957	3.25191	2.67748	543	4.99078	23	0.313725	0.94898	165	9	showjump	showjump	intermed	gelding	gelding	3.87341	3.25191	3.0399	3.95815	1.40289	1.34287	1.32043	1.4105	age6_10	height163_171
gelding	9	showjumping	intermediate	165	soft	Lunge left	33	19	-1.10384	5.36075	2.56848	5.33276	15	37	-0.599863	2.09307	6.35777	2.20232	544	2.79563	24	0.365385	0.711538	165	9	showjump	showjump	intermed	gelding	gelding	0.599863	6.35777	1.10384	2.56848	0.880061	1.58791	1.02501	1.26596	age6_10	height163_171
mare	5	allround	novel	161	hard	Straight line	12	10	-0.198266	6.37086	7.91665	8.65942	1.5	19.5	7.07079	3.64131	3.44021	4.01798	113	7.91913	34	0.454545	0.928571	161	5	allround	allround	novel	mare	mare	7.07079	3.44021	0.198266	7.91665	1.63067	1.3619	0.667286	1.67739	age_6	height155_163
mare	5	allround	novel	161	soft	Lunge right	28	29	-0.596364	13.1686	6.49064	10.7404	12	53	16.2822	4.52015	2.08748	5.20638	114	6.51797	35	0.508772	0.815385	161	5	allround	allround	novel	mare	mare	16.2822	2.08748	0.596364	6.49064	2.00876	1.202	0.878775	1.59614	age_6	height155_163
mare	5	allround	novel	161	soft	Lunge left	66	7	-10.7299	7.7245	4.33421	8.25211	12	62	3.41355	3.57238	5.70843	5.56747	115	11.5722	36	0.0958904	0.837838	161	5	allround	allround	novel	mare	mare	3.41355	5.70843	10.7299	4.33421	1.35926	1.54571	1.80988	1.44287	age_6	height155_163
gelding	11	dressage	intermediate	166	hard	Straight line	18	1	-8.80771	6.42302	-5.78329	8.04061	17	2	-6.56974	3.9721	-3.67705	2.99778	656	10.5367	43	0.0526316	0.105263	166	11	dressage	dressage	intermed	gelding	gelding	6.56974	3.67705	8.80771	5.78329	1.60098	1.38476	1.72272	1.55076	age11_15	height163_171
gelding	11	dressage	intermediate	166	soft	Lunge right	15	34	2.7393	6.2921	5.07166	6.86494	22	26	7.27877	2.5627	-3.81515	2.79109	657	5.76416	44	0.693878	0.541667	166	11	dressage	dressage	intermed	gelding	gelding	7.27877	3.81515	2.7393	5.07166	1.64253	1.39758	1.2865	1.50068	age11_15	height163_171
gelding	11	dressage	intermediate	166	soft	Lunge left	46	2	-10.3755	7.09761	-2.84924	4.74305	39	9	-15.7465	2.49565	-1.04365	2.06168	658	10.7596	45	0.0416667	0.1875	166	11	dressage	dressage	intermed	gelding	gelding	15.7465	1.04365	10.3755	2.84924	1.99203	1.01074	1.79474	1.29922	age11_15	height163_171
gelding	4	dressage	novel	165	hard	Straight line	14	1	-15.0228	9.02194	6.40023	8.71132	9	8	-8.29273	3.52874	2.28725	2.38252	374	16.3294	64	0.0666667	0.470588	165	4	dressage	dressage	novel	gelding	gelding	8.29273	2.28725	15.0228	6.40023	1.69697	1.22978	1.96874	1.59056	age_6	height163_171
gelding	4	dressage	novel	165	soft	Lunge right	62	0	-19.7611	8.13045	-8.56891	9.97575	36.5	24.5	-4.82269	3.01286	2.23882	2.76085	375	21.539	65	0	0.401639	165	4	dressage	dressage	novel	gelding	gelding	4.82269	2.23882	19.7611	8.56891	1.48191	1.22322	2.1084	1.71093	age_6	height163_171
gelding	4	dressage	novel	165	soft	Lunge left	30	0	-16.4387	7.3927	8.14119	9.56027	16.5	11.5	-14.7221	3.47811	1.02163	3.74571	376	18.3442	66	0	0.410714	165	4	dressage	dressage	novel	gelding	gelding	14.7221	1.02163	16.4387	8.14119	1.95881	1.00536	2.01357	1.68916	age_6	height163_171
gelding	14	showjumping	novel	172	hard	Straight line	5	24	8.64941	7.89444	9.05325	7.8304	5.5	23.5	2.06715	4.44494	9.59627	4.61197	545	12.5209	70	0.827586	0.810345	172	14	showjump	showjump	novel	gelding	gelding	2.06715	9.59627	8.64941	9.05325	1.19907	1.76005	1.71493	1.73461	age11_15	height171_
gelding	14	showjumping	novel	172	soft	Lunge right	8	36	3.03403	4.60936	-6.25763	5.43664	9.5	33.5	4.82974	1.59851	0.263909	3.04442	546	6.95437	71	0.818182	0.77907	172	14	showjump	showjump	novel	gelding	gelding	4.82974	0.263909	3.03403	6.25763	1.48245	0.716743	1.31979	1.58162	age11_15	height171_
gelding	14	showjumping	novel	172	soft	Lunge left	2	44	10.4648	6.5442	5.78453	7.49793	24	22	-6.27911	2.87859	5.48008	5.52038	547	11.9571	72	0.956522	0.478261	172	14	showjump	showjump	novel	gelding	gelding	6.27911	5.48008	10.4648	5.78453	1.58298	1.53002	1.79859	1.55084	age11_15	height171_
mare	18	allround	novel	158	.	Straight line	8	5	-1.80661	4.22504	-3.56709	5.77885	8.5	5.5	2.29915	3.34711	-12.4731	3.24601	56	3.99849	73	0.384615	0.392857	158	18	allround	allround	novel	mare	mare	2.29915	12.4731	1.80661	3.56709	1.23138	1.87929	1.15935	1.37429	age15_	height155_163
mare	18	allround	novel	158	.	Lunge right	0	24	25.6754	9.15666	15.1133	7.10264	12	13	7.86047	2.80743	-7.19669	3.38274	57	29.7932	74	1	0.52	158	18	allround	allround	novel	mare	mare	7.86047	7.19669	25.6754	15.1133	1.67441	1.63788	2.25102	1.9717	age15_	height155_163
mare	18	allround	novel	158	.	Lunge left	39	0	-20.6295	10.5347	-17.9593	9.27606	31.5	12.5	-1.15136	3.55265	-4.21996	3.65103	58	27.3516	75	0	0.284091	158	18	allround	allround	novel	mare	mare	1.15136	4.21996	20.6295	17.9593	1.03586	1.43327	2.13119	2.0586	age15_	height155_163
mare	9	dressage	intermediate	163	soft	Lunge right	31	0	-34.4254	13.3687	-14.4133	12.346	5.5	27.5	16.6807	3.25281	2.24027	5.67864	380	37.321	118	0	0.833333	163	9	dressage	dressage	intermed	mare	mare	16.6807	2.24027	34.4254	14.4133	2.02094	1.22342	2.42225	1.94846	age6_10	height163_171
mare	9	dressage	intermediate	163	hard	Straight line	5	16	2.58055	6.80932	2.40919	5.0949	0.5	24.5	5.23622	3.46589	11.926	5.05426	381	3.53036	119	0.761905	0.98	163	9	dressage	dressage	intermed	mare	mare	5.23622	11.926	2.58055	2.40919	1.51271	1.85833	1.26744	1.24586	age6_10	height163_171
mare	9	dressage	intermediate	163	soft	Lunge left	2	33	21.9659	11.2346	25.6492	7.96501	15.5	18.5	-4.09361	3.32492	16.9331	4.01991	382	33.7696	120	0.942857	0.544118	163	9	dressage	dressage	intermed	mare	mare	4.09361	16.9331	21.9659	25.6492	1.42242	2.02854	2.1649	2.25045	age6_10	height163_171
gelding	11	showjumping	intermediate	168	hard	Straight line	32	10	-11.6752	14.5097	-17.3927	15.4181	15.5	26.5	-0.631877	3.19864	4.76767	3.76715	551	20.9479	127	0.238095	0.630952	168	11	showjump	showjump	intermed	gelding	gelding	0.631877	4.76767	11.6752	17.3927	0.891576	1.47767	1.84849	2.04217	age11_15	height163_171
gelding	11	showjumping	intermediate	168	soft	Lunge right	3	52	16.0432	11.3973	-1.44922	9.26869	8.5	47.5	5.4007	2.59088	1.47781	2.62173	552	16.1085	128	0.945455	0.848214	168	11	showjump	showjump	intermed	gelding	gelding	5.4007	1.47781	16.0432	1.44922	1.52445	1.10257	2.00135	1.09719	age11_15	height163_171
gelding	11	showjumping	intermediate	168	soft	Lunge left	17	15	-0.394482	15.914	-12.0747	8.72662	14.5	17.5	-3.36101	3.16018	5.29503	3.13527	553	12.0811	129	0.46875	0.546875	168	11	showjump	showjump	intermed	gelding	gelding	3.36101	5.29503	0.394482	12.0747	1.354	1.51694	0.792514	1.8641	age11_15	height163_171
mare	12	allround	novel	171	soft	Lunge right	3	45	7.49623	4.33982	-6.11762	4.24511	24	23	7.52496	3.56876	-11.0669	2.33162	201	9.67568	133	0.9375	0.489362	171	12	allround	allround	novel	mare	mare	7.52496	11.0669	7.49623	6.11762	1.65625	1.82392	1.65467	1.5727	age11_15	height171_
mare	13	allround	novel	171	hard	Straight line	4	26	7.03079	5.66571	0.0906481	5.63413	18	12	4.12537	4.67394	-8.77084	3.34486	200	7.03138	134	0.866667	0.4	171	13	allround	allround	novel	mare	mare	4.12537	8.77084	7.03079	0.0906481	1.42517	1.72092	1.62836	0.548706	age11_15	height171_
mare	14	allround	novel	171	soft	Lunge left	26	18	-0.545898	4.39293	-5.44261	5.78698	32.5	11.5	0.488591	3.61303	-7.74117	2.40737	202	5.46991	135	0.409091	0.261364	171	14	allround	allround	novel	mare	mare	0.488591	7.74117	0.545898	5.44261	0.836058	1.66802	0.859564	1.5274	age11_15	height171_
mare	7	showjumping	intermediate	164	hard	Straight line	23	10	-1.39353	8.99688	8.33289	9.58795	7.5	25.5	3.90948	3.31394	1.47627	2.96404	554	8.44861	136	0.30303	0.772727	164	7	showjump	showjump	intermed	mare	mare	3.90948	1.47627	1.39353	8.33289	1.40614	1.10228	1.0865	1.69902	age6_10	height163_171
mare	7	showjumping	intermediate	164	soft	Lunge right	72	16	-5.27903	8.90458	7.12475	9.25936	29	58	13.4751	3.85701	-1.24865	2.8226	555	8.86737	137	0.181818	0.666667	164	7	showjump	showjump	intermed	mare	mare	13.4751	1.24865	5.27903	7.12475	1.91595	1.05709	1.51579	1.63378	age6_10	height163_171
mare	7	showjumping	intermediate	164	soft	Lunge left	11	25	2.22921	5.41309	3.18008	10.2422	21.5	17.5	-7.49854	3.41052	3.62176	2.55108	556	3.88359	138	0.694444	0.448718	164	7	showjump	showjump	intermed	mare	mare	7.49854	3.62176	2.22921	3.18008	1.65479	1.37953	1.22191	1.33539	age6_10	height163_171
mare	16	allround	novel	157	hard	Straight line	24	9	-5.93411	9.61858	-17.3614	7.39241	11.5	20.5	3.40762	2.1371	-1.51392	3.11386	170	18.3476	139	0.272727	0.640625	157	16	allround	allround	novel	mare	mare	3.40762	1.51392	5.93411	17.3614	1.35867	1.10924	1.56077	2.04125	age15_	height155_163
mare	16	allround	novel	157	soft	Lunge right	29	11	-2.77434	7.24563	-4.80814	9.0686	37	2	-11.1059	4.23074	-3.82198	3.00552	171	5.55114	140	0.275	0.0512821	157	16	allround	allround	novel	mare	mare	11.1059	3.82198	2.77434	4.80814	1.82553	1.39821	1.2906	1.48079	age15_	height155_163
mare	16	allround	novel	157	soft	Lunge left	40	1	-12.0974	7.51441	-26.4199	9.72724	14.5	25.5	17.6768	3.5518	-1.55331	2.87537	172	29.0578	141	0.0243902	0.6375	157	16	allround	allround	novel	mare	mare	17.6768	1.55331	12.0974	26.4199	2.05046	1.11639	1.86497	2.26716	age15_	height155_163
gelding	7	showjumping	intermediate	168	hard	Straight line	42	4	-17.2027	12.496	-1.69283	11.5239	13.5	32.5	2.04568	2.12472	-0.155292	3.34341	557	17.2858	142	0.0869565	0.706522	168	7	showjump	showjump	intermed	gelding	gelding	2.04568	0.155292	17.2027	1.69283	1.19594	0.627751	2.03657	1.14065	age6_10	height163_171
gelding	7	showjumping	intermediate	168	soft	Lunge right	44	1	-17.9919	10.2553	1.71795	8.65735	21.5	22.5	2.98089	1.43822	-5.5246	2.76622	558	18.0737	143	0.0222222	0.511364	168	7	showjump	showjump	intermed	gelding	gelding	2.98089	5.5246	17.9919	1.71795	1.31397	1.53312	2.05954	1.14486	age6_10	height163_171
gelding	7	showjumping	intermediate	168	soft	Lunge left	47	5	-11.1002	11.0797	-26.6691	8.15979	10.5	40.5	0.5078	2.16542	6.60735	2.30018	559	28.887	144	0.0961538	0.794118	168	7	showjump	showjump	intermed	gelding	gelding	0.5078	6.60735	11.1002	26.6691	0.844157	1.60327	1.82529	2.27249	age6_10	height163_171
mare	13	allround	novel	164	hard	Straight line	9	10	0.525244	6.72293	9.82293	8.5576	4.5	14.5	1.34984	2.21063	4.15921	3.97213	452	9.83696	148	0.526316	0.763158	164	13	allround	allround	novel	mare	mare	1.34984	4.15921	0.525244	9.82293	1.07788	1.42808	0.851315	1.77035	age11_15	height163_171
mare	13	allround	novel	164	soft	Lunge right	17	51	3.99343	6.03661	3.82941	4.48853	34.5	33.5	-1.8852	2.61149	1.38092	2.54519	453	5.5328	149	0.75	0.492647	164	13	allround	allround	novel	mare	mare	1.8852	1.38092	3.99343	3.82941	1.17176	1.08403	1.41363	1.39889	age11_15	height163_171
mare	13	allround	novel	164	soft	Lunge left	79	0	-11.3336	5.48903	2.52959	8.65635	44.5	34.5	-5.46115	3.99565	3.14547	4.8335	454	11.6125	150	0	0.436709	164	13	allround	allround	novel	mare	mare	5.46115	3.14547	11.3336	2.52959	1.5287	1.33175	1.83482	1.26114	age11_15	height163_171
mare	12	allround	novel	163	hard	Straight line	23	1	-10.4849	5.14692	-0.822396	6.24845	9	14	5.06536	4.16385	-1.05818	2.12545	203	10.5171	157	0.0416667	0.608696	163	12	allround	allround	novel	mare	mare	5.06536	1.05818	10.4849	0.822396	1.50021	1.01424	1.79946	0.952292	age11_15	height163_171
mare	12	allround	novel	163	soft	Lunge right	21	25	1.59102	4.42151	-5.37603	6.22776	20.5	25.5	9.38608	2.66356	-3.98785	2.82919	204	5.60652	158	0.543478	0.554348	163	12	allround	allround	novel	mare	mare	9.38608	3.98785	1.59102	5.37603	1.75033	1.41314	1.1231	1.5227	age11_15	height163_171
mare	12	allround	novel	163	soft	Lunge left	41	0	-10.5048	3.25675	1.17054	5.59688	38.5	2.5	-8.37528	2.03651	-3.84348	2.51164	205	10.5699	159	0	0.0609756	163	12	allround	allround	novel	mare	mare	8.37528	3.84348	10.5048	1.17054	1.70118	1.40017	1.80031	1.04015	age11_15	height163_171
gelding	10	dressage	advanced	178	hard	Straight line	14	22	1.44154	5.74249	2.38323	7.12504	27	8	-0.31016	2.1167	-4.64415	2.51759	560	2.78529	163	0.611111	0.228571	178	10	dressage	dressage	advanced	gelding	gelding	0.31016	4.64415	1.44154	2.38323	0.746271	1.468	1.09574	1.24249	age6_10	height171_
gelding	10	dressage	advanced	178	soft	Lunge right	3	39	12.1457	7.93221	13.9844	10.7494	28.5	12.5	0.935597	2.84744	-9.63427	2.78055	561	18.5224	164	0.928571	0.304878	178	10	dressage	dressage	advanced	gelding	gelding	0.935597	9.63427	12.1457	13.9844	0.983495	1.76179	1.86683	1.9338	age6_10	height171_
gelding	10	dressage	advanced	178	soft	Lunge left	14	7	-3.31231	6.23352	-4.04509	8.91819	21	0	-4.98259	1.6262	-2.72557	1.90645	562	5.22821	165	0.333333	0	178	10	dressage	dressage	advanced	gelding	gelding	4.98259	2.72557	3.31231	4.04509	1.49405	1.28489	1.34906	1.41818	age6_10	height171_
gelding	12	dressage	novel	165	hard	Straight line	16	13	-0.605932	8.37445	2.99857	8.56343	28	1	-5.89957	2.68992	-4.45902	4.14347	131	3.05918	166	0.448276	0.0344828	165	12	dressage	dressage	novel	gelding	gelding	5.89957	4.45902	0.605932	2.99857	1.55849	1.45315	0.882279	1.31592	age11_15	height163_171
gelding	12	dressage	novel	165	soft	Lunge right	27	29	0.714222	4.90598	2.84696	5.48642	45.5	9.5	-0.208146	2.41889	-8.01842	3.18733	132	2.93518	167	0.517857	0.172727	165	12	dressage	dressage	novel	gelding	gelding	0.208146	8.01842	0.714222	2.84696	0.675448	1.68276	0.919302	1.29896	age11_15	height163_171
gelding	12	dressage	novel	165	soft	Lunge left	19	24	1.72238	5.50421	2.83464	5.63088	36.5	5.5	-6.24968	2.15039	-1.40595	2.7327	133	3.31689	168	0.55814	0.130952	165	12	dressage	dressage	novel	gelding	gelding	6.24968	1.40595	1.72238	2.83464	1.58112	1.08891	1.1456	1.29755	age11_15	height163_171
gelding	6	dressage	intermediate	170	.	Lunge left	25	5	-11.1665	11.5287	1.7266	13.4979	21.5	10.5	-23.3885	3.54555	2.5931	4.82955	101	11.2992	169	0.166667	0.328125	170	6	dressage	dressage	intermed	gelding	gelding	23.3885	2.5931	11.1665	1.7266	2.19913	1.26898	1.82801	1.1463	age6_10	height163_171
gelding	6	dressage	intermediate	170	.	Lunge right	23	5	-11.9711	11.1577	-12.0687	13.7564	13.5	15.5	17.4014	4.9654	-5.3441	4.62098	102	16.9988	170	0.178571	0.534483	170	6	dressage	dressage	intermed	gelding	gelding	17.4014	5.3441	11.9711	12.0687	2.04242	1.52044	1.86009	1.86387	age6_10	height163_171
gelding	6	dressage	intermediate	170	.	Straight line	25	0	-25.2486	12.0669	-13.6816	16.1171	16.5	8.5	-4.31976	4.55054	0.900202	4.74082	103	28.7172	171	0	0.34	170	6	dressage	dressage	intermed	gelding	gelding	4.31976	0.900202	25.2486	13.6816	1.44167	0.974059	2.24161	1.92324	age6_10	height163_171
mare	9	dressage	novel	165	hard	Straight line	4	6	1.24355	7.65577	3.24428	7.87967	2	8	-1.31235	4.79279	7.4114	4.82992	455	3.47445	175	0.6	0.8	165	9	dressage	dressage	novel	mare	mare	1.31235	7.4114	1.24355	3.24428	1.07032	1.64997	1.05601	1.34208	age6_10	height163_171
mare	9	dressage	novel	165	soft	Lunge right	35	11	-4.4211	9.19839	3.50396	7.4686	18.5	27.5	7.10947	2.63482	-2.91626	3.02199	456	5.64126	176	0.23913	0.597826	165	9	dressage	dressage	novel	mare	mare	7.10947	2.91626	4.4211	3.50396	1.6329	1.30679	1.45005	1.36817	age6_10	height163_171
mare	9	dressage	novel	165	soft	Lunge left	2	47	7.35292	4.86122	-17.9642	4.77311	21	28	-2.92953	2.45085	9.68568	2.58684	457	19.4108	177	0.959184	0.571429	165	9	dressage	dressage	novel	mare	mare	2.92953	9.68568	7.35292	17.9642	1.30828	1.76414	1.6467	2.05874	age6_10	height163_171
gelding	15	dressage	intermediate	174	hard	Straight line	15	26	4.45617	12.7945	-3.61454	10.2851	17.5	23.5	-3.51549	4.07844	5.85501	3.51891	563	5.73779	187	0.634146	0.573171	174	15	dressage	dressage	intermed	gelding	gelding	3.51549	5.85501	4.45617	3.61454	1.36929	1.55554	1.45292	1.37884	age11_15	height171_
gelding	15	dressage	intermediate	174	soft	Lunge right	49	1	-10.9881	7.37508	-5.98318	5.60981	14.5	34.5	-1.01691	3.23557	6.44603	2.46639	564	12.5115	188	0.02	0.704082	174	15	dressage	dressage	intermed	gelding	gelding	1.01691	6.44603	10.9881	5.98318	1.0042	1.59339	1.82067	1.56399	age11_15	height171_
gelding	15	dressage	intermediate	174	soft	Lunge left	12	39	2.63941	4.24632	-2.49565	4.55972	22.5	28.5	-2.34362	2.43811	4.52176	1.84916	565	3.63246	189	0.764706	0.558824	174	15	dressage	dressage	intermed	gelding	gelding	2.34362	4.52176	2.63941	2.49565	1.23729	1.45823	1.27461	1.25689	age11_15	height171_
mare	11	showjumping	novel	168	hard	Straight line	17	18	1.40028	8.33226	-17.4402	12.8313	30.5	4.5	-0.985872	1.28003	-2.73217	2.09776	371	17.4964	193	0.514286	0.128571	168	11	showjump	showjump	novel	mare	mare	0.985872	2.73217	1.40028	17.4402	0.996449	1.28566	1.08781	2.04356	age11_15	height163_171
mare	11	showjumping	novel	168	soft	Lunge right	74	1	-50.1552	24.1491	-35.5368	37.1455	62.5	11.5	-1.74361	2.90983	-8.52397	2.90614	372	61.4688	194	0.0133333	0.155405	168	11	showjump	showjump	novel	mare	mare	1.74361	8.52397	50.1552	35.5368	1.14911	1.70868	2.66121	2.44157	age11_15	height163_171
mare	11	showjumping	novel	168	soft	Lunge left	0	74	43.8191	20.1182	12.2664	20.1138	31.5	41.5	-0.194878	3.4199	1.46367	2.69249	373	45.5036	195	1	0.568493	168	11	showjump	showjump	novel	mare	mare	0.194878	1.46367	43.8191	12.2664	0.664417	1.09992	2.57286	1.87145	age11_15	height163_171
gelding	6	allround	novel	165	hard	Straight line	2	20	11.5776	8.79962	5.35897	8.15639	9.5	12.5	-3.81491	6.27885	3.91378	3.54456	92	12.7577	199	0.909091	0.568182	165	6	allround	allround	novel	gelding	gelding	3.81491	3.91378	11.5776	5.35897	1.39756	1.40653	1.84461	1.52149	age6_10	height163_171
gelding	6	allround	novel	165	soft	Lunge right	28	2	-16.6926	15.264	10.096	12.0408	1.5	29.5	26.2152	3.90604	4.45725	3.85423	93	19.5082	200	0.0666667	0.951613	165	6	allround	allround	novel	gelding	gelding	26.2152	4.45725	16.6926	10.096	2.26276	1.453	2.0213	1.78253	age6_10	height163_171
gelding	6	allround	novel	165	soft	Lunge left	5	22	18.8513	14.734	-2.52658	11.2012	14	14	-17.5932	4.37666	10.429	4.64877	94	19.0199	201	0.814815	0.5	165	6	allround	allround	novel	gelding	gelding	17.5932	10.429	18.8513	2.52658	2.04803	1.79705	2.0837	1.26076	age6_10	height163_171
gelding	11	dressage	intermediate	165	hard	Straight line	0	26	15.5989	8.66254	-0.72591	10.7195	10.5	14.5	-3.3966	3.38798	10.7922	2.33888	566	15.6158	202	1	0.58	165	11	dressage	dressage	intermed	gelding	gelding	3.3966	10.7922	15.5989	0.72591	1.35757	1.8125	1.98735	0.92304	age11_15	height163_171
gelding	11	dressage	intermediate	165	soft	Lunge right	7	40	5.24711	6.44817	12.5065	9.08138	3.5	42.5	3.16235	2.33938	5.65107	2.4489	567	13.5627	203	0.851064	0.923913	165	11	dressage	dressage	intermed	gelding	gelding	3.16235	5.65107	5.24711	12.5065	1.33353	1.54182	1.51349	1.88055	age11_15	height163_171
gelding	11	dressage	intermediate	165	soft	Lunge left	3	52	13.127	8.80733	3.86635	10.9729	27	28	-6.6363	2.90456	12.9953	2.5962	568	13.6845	204	0.945455	0.509091	165	11	dressage	dressage	intermed	gelding	gelding	6.6363	12.9953	13.127	3.86635	1.60502	1.89866	1.90345	1.40225	age11_15	height163_171
gelding	13	showjumping	intermediate	170	soft	Straight line	15	8	-2.21051	8.05632	2.28961	5.72076	9	17	4.20469	1.78882	-2.62303	3.51096	239	3.18255	211	0.347826	0.653846	170	13	showjump	showjump	intermed	gelding	gelding	4.20469	2.62303	2.21051	2.28961	1.43197	1.27263	1.21933	1.2301	age11_15	height163_171
gelding	13	showjumping	intermediate	170	soft	Lunge right	0	42	16.1474	8.01396	-7.26922	3.78029	7.5	33.5	5.64405	2.89855	0.409854	3.84491	240	17.7082	212	1	0.817073	170	13	showjump	showjump	intermed	gelding	gelding	5.64405	0.409854	16.1474	7.26922	1.54134	0.800124	2.00459	1.642	age11_15	height163_171
gelding	13	showjumping	intermediate	170	soft	Lunge left	44	0	-18.4565	6.47419	15.5035	4.5649	24	19	1.19514	2.67469	-3.65343	3.844	241	24.104	213	0	0.44186	170	13	showjump	showjump	intermed	gelding	gelding	1.19514	3.65343	18.4565	15.5035	1.04557	1.38253	2.0727	1.9843	age11_15	height163_171
gelding	8	eventing	novel	168	hard	Straight line	0	28	7.70445	4.43732	1.26974	6.22647	11	17	3.77054	3.04352	-1.55917	5.0823	647	7.80838	217	1	0.607143	168	8	event	allround	novel	gelding	gelding	3.77054	1.55917	7.70445	1.26974	1.39348	1.11744	1.66604	1.06152	age6_10	height163_171
gelding	8	eventing	novel	168	soft	Lunge right	30	6	-5.67095	4.32549	-4.01357	3.30844	20	15	-0.476309	1.97439	-0.25269	3.23684	648	6.94755	218	0.166667	0.428571	168	8	event	allround	novel	gelding	gelding	0.476309	0.25269	5.67095	4.01357	0.830754	0.709001	1.54317	1.41541	age6_10	height163_171
gelding	8	eventing	novel	168	soft	Lunge left	17	23	0.782749	4.51612	0.148621	4.19367	20	19	0.314242	2.81654	-0.338836	3.02033	649	0.796733	219	0.575	0.487179	168	8	event	allround	novel	gelding	gelding	0.314242	0.338836	0.782749	0.148621	0.748714	0.762952	0.940601	0.620897	age6_10	height163_171
gelding	5	allround	novel	170	.	Lunge right	16	0	-44.9342	7.4174	-31.6586	5.40599	7.5	8.5	10.4108	3.56213	-6.36145	4.76008	134	54.9669	220	0	0.53125	170	5	allround	allround	novel	gelding	gelding	10.4108	6.36145	44.9342	31.6586	1.79627	1.58814	2.58907	2.37205	age_6	height163_171
gelding	5	allround	novel	170	.	Straight line	27	1	-20.164	8.62603	-2.03113	9.45326	27	1	-7.65632	4.86123	-5.95873	4.96078	135	20.266	221	0.0357143	0.0357143	170	5	allround	allround	novel	gelding	gelding	7.65632	5.95873	20.164	2.03113	1.66343	1.56239	2.11906	1.19381	age_6	height163_171
gelding	5	allround	novel	170	.	Lunge left	0	15	14.1337	6.82625	13.8622	9.00995	10	5	-22.3745	5.8212	1.75814	3.92724	136	19.797	222	1	0.333333	170	5	allround	allround	novel	gelding	gelding	22.3745	1.75814	14.1337	13.8622	2.1749	1.1515	1.93894	1.92956	age_6	height163_171
gelding	5	allround	novel	170	.	Straight line	17	1	-15.5875	11.6043	2.62445	8.62027	9	10	1.67977	2.62285	-0.364862	3.59122	188	15.8069	223	0.0555556	0.526316	170	5	allround	allround	novel	gelding	gelding	1.67977	0.364862	15.5875	2.62445	1.13845	0.777199	1.98698	1.2728	age_6	height163_171
gelding	5	allround	novel	170	.	Lunge left	9	10	0.443702	17.9182	3.80365	9.8011	27.5	0.5	-9.94896	3.69385	-7.04332	5.51754	189	3.82944	224	0.526316	0.0178571	170	5	allround	allround	novel	gelding	gelding	9.94896	7.04332	0.443702	3.80365	1.77601	1.62909	0.816155	1.39653	age_6	height163_171
gelding	5	allround	novel	170	.	Lunge right	26	3	-39.103	27.6108	1.06558	12.114	6.5	24.5	15.0919	5.22912	0.426306	3.95919	190	39.1175	225	0.103448	0.790323	170	5	allround	allround	novel	gelding	gelding	15.0919	0.426306	39.103	1.06558	1.971	0.808035	2.50065	1.01601	age_6	height163_171
gelding	12	dressage	intermediate	179	.	Lunge right	22	0	-33.9644	8.97576	-18.5498	10.3546	11	11	11.0902	4.42326	-19.0594	5.51083	98	38.6998	226	0	0.5	179	12	dressage	dressage	intermed	gelding	gelding	11.0902	19.0594	33.9644	18.5498	1.82488	2.08943	2.4141	2.07532	age11_15	height171_
gelding	12	dressage	intermediate	179	.	Straight line	36	0	-13.3459	8.2637	0.40997	10.901	27	9	-3.1261	8.89718	-15.3883	9.11496	99	13.3522	227	0	0.25	179	12	dressage	dressage	intermed	gelding	gelding	3.1261	15.3883	13.3459	0.40997	1.32969	1.9806	1.91133	0.80018	age11_15	height171_
gelding	12	dressage	intermediate	179	.	Lunge left	0	22	22.2747	10.9683	21.1193	7.70201	17	4	-19.2424	3.90454	-2.20024	5.39094	100	30.695	228	1	0.190476	179	12	dressage	dressage	intermed	gelding	gelding	19.2424	2.20024	22.2747	21.1193	2.09442	1.21792	2.17247	2.14373	age11_15	height171_
mare	11	allround	novel	162	hard	Straight line	7	27	4.89654	6.2217	4.57952	5.03288	23	11	-7.20258	3.49061	0.59229	2.90249	80	6.70433	235	0.794118	0.323529	162	11	allround	allround	novel	mare	mare	7.20258	0.59229	4.89654	4.57952	1.63822	0.877271	1.48755	1.46287	age11_15	height155_163
mare	11	allround	novel	162	soft	Lunge right	21	20	-0.326968	5.49293	-5.76198	4.4358	18.5	22.5	6.29331	3.75286	-2.67374	3.2155	81	5.77125	236	0.487805	0.54878	162	11	allround	allround	novel	mare	mare	6.29331	2.67374	0.326968	5.76198	1.58387	1.27873	0.756182	1.54933	age11_15	height155_163
mare	11	allround	novel	162	soft	Lunge left	23	32	1.16947	3.7703	9.11431	4.78699	33	28	-24.2348	4.03433	3.05316	2.41176	82	9.18904	237	0.581818	0.459016	162	11	allround	allround	novel	mare	mare	24.2348	3.05316	1.16947	9.11431	2.21876	1.32187	1.03991	1.73752	age11_15	height155_163
gelding	16	allround	novel	160	.	Straight line	9	6	-1.42266	9.42697	-9.27812	8.75915	2.5	14.5	3.87632	2.71934	3.19967	4.73737	59	9.38655	238	0.4	0.852941	160	16	allround	allround	novel	gelding	gelding	3.87632	3.19967	1.42266	9.27812	1.40315	1.33745	1.09213	1.74528	age15_	height155_163
gelding	16	allround	novel	160	.	Lunge right	37	5	-5.92357	5.32853	7.78327	5.37202	10	36	10.7347	4.56322	1.84856	5.07626	60	9.78101	239	0.119048	0.782609	160	16	allround	allround	novel	gelding	gelding	10.7347	1.84856	5.92357	7.78327	1.81008	1.16603	1.56008	1.67028	age15_	height155_163
gelding	16	allround	novel	160	.	Lunge left	29	0	-27.8996	6.77022	14.8411	5.5298	8.5	20.5	-0.0267153	4.28309	2.9929	3.07515	61	31.6014	240	0	0.706897	160	16	allround	allround	novel	gelding	gelding	0.0267153	2.9929	27.8996	14.8411	0.404287	1.31529	2.29826	1.96276	age15_	height155_163
gelding	5	showjumping	novel	180	hard	Straight line	15	15	4.96061	18.3796	7.70139	9.62196	25.5	4.5	-3.5506	3.80178	-6.35041	3.32967	191	9.16074	241	0.5	0.15	180	5	showjump	showjump	novel	gelding	gelding	3.5506	6.35041	4.96061	7.70139	1.3727	1.58745	1.4924	1.66587	age_6	height171_
gelding	5	showjumping	novel	180	soft	Lunge right	39	11	-6.81685	10.7146	13.915	9.18583	26	24	3.64173	3.33115	-6.66314	3.6865	192	15.4951	242	0.22	0.48	180	5	showjump	showjump	novel	gelding	gelding	3.64173	6.66314	6.81685	13.915	1.38142	1.60664	1.61583	1.9314	age_6	height171_
gelding	5	showjumping	novel	180	soft	Lunge left	4	10	2.06603	15.1078	11.0765	10.9623	17	0	-7.94871	3.32576	-6.83469	2.49485	193	11.2676	243	0.714286	0	180	5	showjump	showjump	novel	gelding	gelding	7.94871	6.83469	2.06603	11.0765	1.67909	1.61689	1.1989	1.82432	age_6	height171_
mare	11	dressage	intermediate	178	.	Lunge left	25	7	-8.71463	9.08599	-14.9769	13.3383	15.5	15.5	0.624515	5.25596	0.265051	5.8387	107	17.3278	247	0.21875	0.5	178	11	dressage	dressage	intermed	mare	mare	0.624515	0.265051	8.71463	14.9769	0.888967	0.717517	1.71815	1.96723	age11_15	height171_
mare	11	dressage	intermediate	178	.	Straight line	20	7	-9.44191	9.71582	-2.68428	7.72397	10	17	7.17939	3.91679	-2.15208	8.34575	108	9.81606	248	0.259259	0.62963	178	11	dressage	dressage	intermed	mare	mare	7.17939	2.15208	9.44191	2.68428	1.6369	1.2112	1.75293	1.27999	age11_15	height171_
mare	11	dressage	intermediate	178	.	Lunge right	27	18	0.157922	19.6923	0.399859	13.1149	15.5	32.5	22.6641	5.67178	-1.9926	6.47563	109	0.429914	249	0.4	0.677083	178	11	dressage	dressage	intermed	mare	mare	22.6641	1.9926	0.157922	0.399859	2.1819	1.1881	0.630392	0.795201	age11_15	height171_
gelding	8	showjumping	intermediate	168	.	Lunge left	22	1	-34.688	25.866	-15.6504	14.8155	17.5	6.5	-7.20911	6.4232	-1.01399	6.53308	137	38.0551	256	0.0434783	0.270833	168	8	showjump	showjump	intermed	gelding	gelding	7.20911	1.01399	34.688	15.6504	1.63859	1.00348	2.42686	1.98898	age6_10	height163_171
gelding	8	showjumping	intermediate	168	.	Lunge right	8	4	-6.06962	10.1335	-0.870555	10.8683	7.5	6.5	12.6393	7.65035	-16.8934	11.1017	138	6.13174	257	0.333333	0.464286	168	8	showjump	showjump	intermed	gelding	gelding	12.6393	16.8934	6.06962	0.870555	1.88552	2.02735	1.56961	0.965938	age6_10	height163_171
gelding	8	showjumping	intermediate	168	.	Straight line	9	4	-7.54282	12.6853	5.58025	15.088	11	5	0.217705	5.34013	-5.54294	4.50386	139	9.38261	258	0.307692	0.3125	168	8	showjump	showjump	intermed	gelding	gelding	0.217705	5.54294	7.54282	5.58025	0.683073	1.53439	1.65723	1.53696	age6_10	height163_171
gelding	9	dressage	intermediate	162	hard	Straight line	31	27	-0.928317	5.9623	-0.987548	8.46257	43.5	14.5	-3.43008	2.56783	0.0355226	2.91664	569	1.35537	259	0.465517	0.25	162	9	dressage	dressage	intermed	gelding	gelding	3.43008	0.0355226	0.928317	0.987548	1.3609	0.434136	0.981576	0.996872	age6_10	height155_163
gelding	9	dressage	intermediate	162	soft	Lunge right	43	6	-8.38534	6.85791	-1.43929	7.95314	17	31	3.51462	2.44912	-0.834767	2.46009	570	8.50797	260	0.122449	0.645833	162	9	dressage	dressage	intermed	gelding	gelding	3.51462	0.834767	8.38534	1.43929	1.36921	0.955853	1.70169	1.09531	age6_10	height155_163
gelding	9	dressage	intermediate	162	soft	Lunge left	58	2	-15.61	8.32752	-10.7052	8.93377	56	3	-12.3499	3.22542	-3.12847	3.24264	571	18.9281	261	0.0333333	0.0508475	162	9	dressage	dressage	intermed	gelding	gelding	12.3499	3.12847	15.61	10.7052	1.87463	1.32994	1.9877	1.80883	age6_10	height155_163
gelding	6	dressage	intermediate	.	hard	Straight line	20	2	-25.7892	18.3444	-4.99124	12.7379	16.5	4.5	-8.66626	5.72035	-1.64424	4.80947	440	26.2678	262	0.0909091	0.214286		6	dressage	dressage	intermed	gelding	gelding	8.66626	1.64424	25.7892	4.99124	1.71577	1.13238	2.25351	1.49469	age6_10
gelding	6	dressage	intermediate	.	soft	Lunge right	51	12	-10.5949	14.1265	15.361	11.9009	36.5	26.5	5.45368	4.70101	-19.0045	3.94628	441	18.6605	263	0.190476	0.420635		6	dressage	dressage	intermed	gelding	gelding	5.45368	19.0045	10.5949	15.361	1.52817	2.08792	1.80416	1.97973	age6_10
gelding	6	dressage	intermediate	.	soft	Lunge left	58	3	-40.8573	24.3102	-11.8384	18.5806	33.5	27.5	-22.7253	3.59516	6.18377	4.85219	442	42.5378	264	0.0491803	0.45082		6	dressage	dressage	intermed	gelding	gelding	22.7253	6.18377	40.8573	11.8384	2.18337	1.57693	2.52823	1.85491	age6_10
mare	6	dressage	novel	165	hard	Straight line	15	8	-6.33046	10.2061	-0.300942	7.85952	17	6	-6.0013	2.68633	-0.779073	3.19346	662	6.33761	265	0.347826	0.26087	165	6	dressage	dressage	novel	mare	mare	6.0013	0.779073	6.33046	0.300942	1.56517	0.939495	1.5862	0.740663	age6_10	height163_171
mare	6	dressage	novel	166	soft	Lunge right	31	14	-4.09204	8.821	8.59529	6.28951	38	7	-1.2402	2.37658	-3.6442	1.46366	663	9.51966	266	0.311111	0.155556	166	6	dressage	dressage	novel	mare	mare	1.2402	3.6442	4.09204	8.59529	1.05529	1.38166	1.42228	1.71224	age6_10	height163_171
mare	6	dressage	novel	166	soft	Lunge left	5	43	10.2396	7.63542	3.79992	5.57983	43.5	5.5	-7.91997	2.2018	-1.7115	2.04124	664	10.9219	267	0.895833	0.112245	166	6	dressage	dressage	novel	mare	mare	7.91997	1.7115	10.2396	3.79992	1.67757	1.14379	1.78884	1.39619	age6_10	height163_171
gelding	11	showjumping	novel	168	hard	Straight line	17	18	2.27997	8.90258	-8.07199	6.79636	26	8	-1.71238	3.40295	-5.29814	4.12132	572	8.3878	268	0.514286	0.235294	168	11	showjump	showjump	novel	gelding	gelding	1.71238	5.29814	2.27997	8.07199	1.14393	1.51716	1.2288	1.68556	age11_15	height163_171
gelding	11	showjumping	novel	168	soft	Lunge right	58	2	-13.7726	7.9997	-10.6817	7.9984	29	30	8.4245	3.74446	-8.42941	3.39801	573	17.4294	269	0.0333333	0.508475	168	11	showjump	showjump	novel	gelding	gelding	8.4245	8.42941	13.7726	10.6817	1.70367	1.70392	1.92643	1.80784	age11_15	height163_171
gelding	11	showjumping	novel	168	soft	Lunge left	5	47	13.3523	10.2539	5.60321	10.927	44	7	-15.407	4.09042	-3.23857	3.76179	574	14.4804	270	0.903846	0.137255	168	11	showjump	showjump	novel	gelding	gelding	15.407	3.23857	13.3523	5.60321	1.9812	1.34149	1.91157	1.53854	age11_15	height163_171
mare	7	allround	novel	160	hard	Straight line	32	7	-7.33236	9.89889	0.896597	7.6535	5	36	1.66484	2.73696	3.2659	2.32615	428	7.38697	277	0.179487	0.878049	160	7	allround	allround	novel	mare	mare	1.66484	3.2659	7.33236	0.896597	1.13591	1.34431	1.64555	0.973082	age6_10	height155_163
mare	7	allround	novel	160	soft	Lunge right	41	2	-21.7175	11.739	-7.04517	8.85896	6	36	4.68665	2.58689	1.56633	2.4989	429	22.8316	278	0.0465116	0.857143	160	7	allround	allround	novel	mare	mare	4.68665	1.56633	21.7175	7.04517	1.47135	1.11872	2.15875	1.62919	age6_10	height155_163
mare	7	allround	novel	160	soft	Lunge left	36	40	1.645	11.5078	1.99912	9.99375	40	35	-4.53608	2.34324	3.55378	3.24398	430	2.58892	279	0.526316	0.466667	160	7	allround	allround	novel	mare	mare	4.53608	3.55378	1.645	1.99912	1.45939	1.37301	1.13251	1.18908	age6_10	height155_163
gelding	8	dressage	advanced	168	hard	Straight line	19	4	-8.70363	8.14198	-6.41086	8.98362	15.5	7.5	0.166604	3.26971	-5.74712	3.41704	650	10.8098	280	0.173913	0.326087	168	8	dressage	dressage	advanced	gelding	gelding	0.166604	5.74712	8.70363	6.41086	0.638883	1.54833	1.71761	1.59122	age6_10	height163_171
gelding	8	dressage	advanced	168	soft	Lunge right	36	12	-2.93661	5.26168	1.05846	5.92301	18	29	2.19914	2.65144	-0.821093	3.44206	651	3.12154	281	0.25	0.617021	168	8	dressage	dressage	advanced	gelding	gelding	2.19914	0.821093	2.93661	1.05846	1.21776	0.951915	1.30907	1.0143	age6_10	height163_171
gelding	8	dressage	advanced	168	soft	Lunge left	37	0	-13.647	6.94645	0.66003	4.36387	28.5	8.5	-0.663738	2.39924	-3.47952	4.05325	652	13.6629	282	0	0.22973	168	8	dressage	dressage	advanced	gelding	gelding	0.663738	3.47952	13.647	0.66003	0.902608	1.36578	1.92203	0.901345	age6_10	height163_171
gelding	17	dressage	intermediate	164	hard	Straight line	0	22	7.70885	4.8445	15.5231	5.33374	12.5	9.5	-3.29115	3.72537	2.62852	3.42728	308	17.3319	289	1	0.431818	164	17	dressage	dressage	intermed	gelding	gelding	3.29115	2.62852	7.70885	15.5231	1.3469	1.27329	1.66628	1.98493	age15_	height163_171
gelding	17	dressage	intermediate	164	soft	Lunge right	4	52	5.62953	3.66859	7.32399	6.284	22.5	32.5	-3.01689	3.60768	6.23132	3.77943	309	9.23755	290	0.928571	0.590909	164	17	dressage	dressage	intermed	gelding	gelding	3.01689	6.23132	5.62953	7.32399	1.31792	1.57996	1.54035	1.64508	age15_	height163_171
gelding	17	dressage	intermediate	164	soft	Lunge left	0	62	8.74091	4.51578	21.8158	5.65427	40	21	-6.44588	3.44486	2.06764	4.90801	310	23.5017	291	1	0.344262	164	17	dressage	dressage	intermed	gelding	gelding	6.44588	2.06764	8.74091	21.8158	1.59338	1.19914	1.71945	2.16119	age15_	height163_171
gelding	15	dressage	intermediate	168	hard	Straight line	3	39	11.3169	7.2086	9.23308	6.66749	18.5	22.5	-3.62372	3.43878	3.12855	2.81618	578	14.6056	295	0.928571	0.54878	168	15	dressage	dressage	intermed	gelding	gelding	3.62372	3.12855	11.3169	9.23308	1.37971	1.32995	1.83414	1.74316	age11_15	height163_171
gelding	15	dressage	intermediate	168	soft	Lunge right	44	5	-6.44865	6.06396	7.91025	6.79128	14	35	9.46002	3.39111	-0.456185	2.61555	579	10.2057	296	0.102041	0.714286	168	15	dressage	dressage	intermed	gelding	gelding	9.46002	0.456185	6.44865	7.91025	1.75377	0.821836	1.59356	1.67706	age11_15	height163_171
gelding	15	dressage	intermediate	168	soft	Lunge left	0	51	15.4058	8.74393	13.7842	8.80694	27.5	22.5	-12.7432	4.13731	4.57727	3.27141	580	20.6723	297	1	0.45	168	15	dressage	dressage	intermed	gelding	gelding	12.7432	4.57727	15.4058	13.7842	1.88938	1.46269	1.98117	1.92684	age11_15	height163_171
mare	6	eventing	novel	160	hard	Straight line	12	18	4.14529	12.3952	-4.5458	12.6735	10	20	3.48499	2.81168	0.0162871	3.79871	62	6.15205	298	0.6	0.666667	160	6	event	allround	novel	mare	mare	3.48499	0.0162871	4.14529	4.5458	1.36631	0.357241	1.42688	1.46017	age6_10	height155_163
mare	6	eventing	novel	160	soft	Lunge right	17	21	3.04292	8.14583	-2.03525	7.94311	9.5	27.5	7.15421	2.68244	-0.886482	2.29273	63	3.66082	299	0.552632	0.743243	160	6	event	allround	novel	mare	mare	7.15421	0.886482	3.04292	2.03525	1.63546	0.970326	1.32076	1.19441	age6_10	height155_163
mare	6	eventing	novel	160	soft	Lunge left	11	15	1.61164	9.65632	-5.35895	9.44104	22.5	3.5	-9.74708	2.03485	-1.18877	2.39634	64	5.59605	300	0.576923	0.134615	160	6	event	allround	novel	mare	mare	9.74708	1.18877	1.61164	5.35895	1.76693	1.04418	1.12672	1.52149	age6_10	height155_163
mare	20	dressage	intermediate	163	hard	Straight line	3	21	5.08921	3.32483	3.8135	3.82418	23	1	-4.67266	3.02002	-6.17257	3.72748	119	6.35947	301	0.875	0.0416667	163	20	dressage	dressage	intermed	mare	mare	4.67266	6.17257	5.08921	3.8135	1.47025	1.57622	1.50197	1.39743	age15_	height163_171
mare	20	dressage	intermediate	163	hard	Lunge right	1	45	6.21729	3.41881	2.72051	5.13295	33.5	11.5	0.108491	3.06176	-9.69708	2.68485	120	6.78645	302	0.978261	0.255556	163	20	dressage	dressage	intermed	mare	mare	0.108491	9.69708	6.21729	2.72051	0.573916	1.76466	1.57907	1.28429	age15_	height163_171
mare	20	dressage	intermediate	163	hard	Lunge left	2	39	6.76512	3.89004	3.43916	8.36063	22.5	17.5	-4.15024	3.14952	2.56033	2.84873	121	7.58912	303	0.95122	0.4375	163	20	dressage	dressage	intermed	mare	mare	4.15024	2.56033	6.76512	3.43916	1.42731	1.26495	1.61276	1.3618	age15_	height163_171
mare	11	eventing	intermediate	164	hard	Straight line	25	2	-30.4772	22.8983	-35.2546	24.6122	7.5	19.5	0.651692	4.13693	4.14128	3.75057	377	46.602	304	0.0740741	0.722222	164	11	event	allround	intermed	mare	mare	0.651692	4.14128	30.4772	35.2546	0.898485	1.42654	2.3496	2.43671	age11_15	height163_171
mare	11	eventing	intermediate	164	soft	Lunge right	46	4	-8.79549	7.23621	-16.9374	6.49991	1.5	47.5	7.09269	2.29488	3.65168	2.53143	378	19.085	305	0.08	0.969388	164	11	event	allround	intermed	mare	mare	7.09269	3.65168	8.79549	16.9374	1.63193	1.38237	1.72213	2.02867	age11_15	height163_171
mare	11	eventing	intermediate	164	soft	Lunge left	48	1	-13.9707	6.37722	-6.24611	7.10029	35	13	-8.42872	2.00463	0.2626	2.10349	379	15.3034	306	0.0204082	0.270833	164	11	event	allround	intermed	mare	mare	8.42872	0.2626	13.9707	6.24611	1.70389	0.715853	1.93332	1.58089	age11_15	height163_171
gelding	8	showjumping	novel	173	hard	Straight line	10	41	2.86478	5.30117	2.72732	5.88752	29	22	-3.85624	2.28415	3.59134	2.89371	581	3.95541	313	0.803922	0.431373	173	8	showjump	showjump	novel	gelding	gelding	3.85624	3.59134	2.86478	2.72732	1.40133	1.37662	1.30099	1.28509	age6_10	height171_
gelding	8	showjumping	novel	173	soft	Lunge right	9	38	3.12996	4.44994	0.399078	3.36087	22.5	23.5	-1.83124	1.88007	1.8904	2.11407	582	3.1553	314	0.808511	0.51087	173	8	showjump	showjump	novel	gelding	gelding	1.83124	1.8904	3.12996	0.399078	1.16329	1.17257	1.3301	0.794812	age6_10	height171_
gelding	8	showjumping	novel	173	soft	Lunge left	6	24	2.3422	2.53844	3.08502	4.30913	15.5	14.5	-5.0353	1.91503	2.42443	1.65664	583	3.8734	315	0.8	0.483333	173	8	showjump	showjump	novel	gelding	gelding	5.0353	2.42443	2.3422	3.08502	1.49798	1.24782	1.2371	1.3253	age6_10	height171_
gelding	23	dressage	intermediate	176	hard	Straight line	8	5	-2.04447	6.14194	-3.74824	4.7527	5.5	7.5	-2.5514	3.12015	3.4478	2.77522	65	4.26956	316	0.384615	0.576923	176	23	dressage	dressage	intermed	gelding	gelding	2.5514	3.4478	2.04447	3.74824	1.26385	1.36265	1.19576	1.39142	age15_	height171_
gelding	23	dressage	intermediate	176	soft	Lunge right	12	35	2.20024	4.57911	-0.380518	4.86133	4	43	3.32849	2.17311	1.84991	1.95423	66	2.2329	317	0.744681	0.914894	176	23	dressage	dressage	intermed	gelding	gelding	3.32849	1.84991	2.20024	0.380518	1.35071	1.16624	1.21792	0.785405	age15_	height171_
gelding	23	dressage	intermediate	176	soft	Lunge left	2	33	5.57486	3.73072	0.866758	5.66722	18.5	16.5	-5.6497	1.87313	4.88931	3.99629	67	5.64184	318	0.942857	0.471429	176	23	dressage	dressage	intermed	gelding	gelding	5.6497	4.88931	5.57486	0.866758	1.54172	1.487	1.53659	0.964883	age15_	height171_
gelding	14	allround	novel	165	soft	Lunge right	40	0	-24.8511	10.2344	3.00045	7.55062	14.5	28.5	-0.706893	3.25383	10.2128	3.67166	395	25.0316	322	0	0.662791	165	14	allround	allround	novel	gelding	gelding	0.706893	10.2128	24.8511	3.00045	0.916935	1.78767	2.23273	1.31612	age11_15	height163_171
gelding	14	allround	novel	165	soft	Lunge left	0	31	22.5449	14.4584	-5.56053	6.55292	32.5	9.5	-0.765099	3.15035	-5.92282	4.83705	396	23.2206	323	1	0.22619	165	14	allround	allround	novel	gelding	gelding	0.765099	5.92282	22.5449	5.56053	0.935254	1.56003	2.17903	1.5356	age11_15	height163_171
gelding	14	allround	novel	165	hard	Straight line	9	12	1.27287	10.0011	-1.94147	6.25245	14	6	-5.77263	2.19922	2.13933	3.96052	397	2.32153	324	0.571429	0.3	165	14	allround	allround	novel	gelding	gelding	5.77263	2.13933	1.27287	1.94147	1.55004	1.2094	1.06217	1.18041	age11_15	height163_171
gelding	8	showjumping	intermediate	162	hard	Straight line	3	27	7.93397	6.12332	13.3696	6.92974	15.5	14.5	-3.9709	3.26766	4.68642	4.11972	584	15.5465	325	0.9	0.483333	162	8	showjump	showjump	intermed	gelding	gelding	3.9709	4.68642	7.93397	13.3696	1.41163	1.47133	1.67831	1.91218	age6_10	height155_163
gelding	8	showjumping	intermediate	162	soft	Lunge right	1	45	6.39038	3.45375	19.2433	7.71752	23	23	-0.540882	2.69559	1.30995	3.07247	585	20.2766	326	0.978261	0.5	162	8	showjump	showjump	intermed	gelding	gelding	0.540882	1.30995	6.39038	19.2433	0.857582	1.06983	1.58994	2.09445	age6_10	height155_163
gelding	8	showjumping	intermediate	162	soft	Lunge left	39	7	-3.71332	4.10896	0.36593	6.27472	23	23	-6.45438	2.24835	5.45532	2.16325	586	3.73131	327	0.152174	0.5	162	8	showjump	showjump	intermed	gelding	gelding	6.45438	5.45532	3.71332	0.36593	1.59391	1.52829	1.38816	0.777767	age6_10	height155_163
mare	9	allround	novel	160	hard	Straight line	21	4	-14.5473	11.6373	-4.03924	10.2666	10	15	-0.867349	5.98978	1.52017	2.8446	173	15.0976	331	0.16	0.6	160	9	allround	allround	novel	mare	mare	0.867349	1.52017	14.5473	4.03924	0.965047	1.11038	1.95297	1.41767	age6_10	height155_163
mare	9	allround	novel	160	soft	Lunge right	22	19	-1.60915	13.3854	-1.06728	7.77184	20.5	20.5	-6.62488	3.78316	6.73048	4.89105	174	1.93092	332	0.463415	0.5	160	9	allround	allround	novel	mare	mare	6.62488	6.73048	1.60915	1.06728	1.60433	1.61069	1.12629	1.01641	age6_10	height155_163
mare	9	allround	novel	160	soft	Lunge left	55	1	-12.2172	8.01086	3.62577	8.62936	18	41	6.95427	3.86017	-2.00754	5.23941	175	12.7439	333	0.0178571	0.694915	160	9	allround	allround	novel	mare	mare	6.95427	2.00754	12.2172	3.62577	1.62391	1.19033	1.86957	1.37991	age6_10	height155_163
gelding	7	allround	novel	.	soft	Lunge left	55	16	-7.35794	9.94832	1.47811	7.38555	47	23	-9.31543	3.17998	2.33682	3.63398	47	7.50494	346	0.225352	0.328571		7	allround	allround	novel	gelding	gelding	9.31543	2.33682	7.35794	1.47811	1.74703	1.23639	1.64698	1.10262	age6_10
gelding	7	allround	novel	.	hard	Straight line	17	11	-5.91689	13.2946	-0.340216	4.05696	8	20	-0.961354	3.23076	3.50586	1.99502	48	5.92666	347	0.392857	0.714286		7	allround	allround	novel	gelding	gelding	0.961354	3.50586	5.91689	0.340216	0.990195	1.36835	1.55964	0.763728	age6_10
gelding	7	allround	novel	.	soft	Lunge right	52	25	-3.69008	9.92532	3.04166	7.59336	8.5	68.5	7.68468	2.7934	1.94679	3.2496	49	4.78209	348	0.324675	0.88961		7	allround	allround	novel	gelding	gelding	7.68468	1.94679	3.69008	3.04166	1.66497	1.18122	1.38599	1.32062	age6_10
mare	19	dressage	intermediate	158	hard	Straight line	3	26	11.0977	7.29145	-7.52802	10.8396	5	24	2.46165	3.64715	2.53679	2.95493	95	13.4101	352	0.896552	0.827586	158	19	dressage	dressage	intermed	mare	mare	2.46165	2.53679	11.0977	7.52802	1.25258	1.26203	1.82519	1.65642	age15_	height155_163
mare	19	dressage	intermediate	158	soft	Lunge right	0	45	14.8469	5.96673	10.1674	5.19252	8.5	36.5	0.82028	2.73223	2.77106	1.69606	96	17.9946	353	1	0.811111	158	19	dressage	dressage	intermed	mare	mare	0.82028	2.77106	14.8469	10.1674	0.951679	1.29021	1.96295	1.78568	age15_	height155_163
mare	19	dressage	intermediate	158	soft	Lunge left	15	8	-2.66402	6.43873	-9.5654	8.29566	2	21	6.82732	3.27213	3.17172	2.5509	97	9.92945	354	0.347826	0.913043	158	19	dressage	dressage	intermed	mare	mare	6.82732	3.17172	2.66402	9.5654	1.61645	1.33452	1.27757	1.75864	age15_	height155_163
gelding	12	allround	novel	163	hard	Straight line	18	2	-7.84662	5.36132	-8.87018	6.52766	15	5	-0.0460538	1.5625	-5.51663	1.81013	401	11.8427	355	0.1	0.25	163	12	allround	allround	novel	gelding	gelding	0.0460538	5.51663	7.84662	8.87018	0.463251	1.53256	1.67367	1.72577	age11_15	height163_171
gelding	12	allround	novel	163	soft	Lunge left	16	2	-8.47299	9.51815	-16.4085	11.6938	23.5	1.5	-11.1121	3.84292	-5.58217	4.35317	402	18.467	356	0.111111	0.06	163	12	allround	allround	novel	gelding	gelding	11.1121	5.58217	8.47299	16.4085	1.82578	1.5371	1.70612	2.01264	age11_15	height163_171
gelding	12	allround	novel	163	soft	Lunge right	3	51	14.8063	8.65804	15.1077	8.8316	23	31	7.81775	3.30972	-2.95273	3.21025	403	21.1534	357	0.944444	0.574074	163	12	allround	allround	novel	gelding	gelding	7.81775	2.95273	14.8063	15.1077	1.67213	1.31086	1.9616	1.97151	age11_15	height163_171
gelding	19	dressage	advanced	162	.	Straight line	20	5	-6.69862	9.88902	4.29616	11.7276	21.5	4.5	-2.27262	4.12182	-5.9121	5.50174	140	7.95792	361	0.2	0.173077	162	19	dressage	dressage	advanced	gelding	gelding	2.27262	5.9121	6.69862	4.29616	1.22781	1.55932	1.60878	1.43969	age15_	height155_163
gelding	19	dressage	advanced	162	.	Lunge right	25	0	-21.6222	6.34984	11.4371	8.28582	12.5	12.5	4.46363	3.87126	-6.33402	4.40738	141	24.4607	362	0	0.5	162	19	dressage	dressage	advanced	gelding	gelding	4.46363	6.33402	21.6222	11.4371	1.45352	1.58643	2.15638	1.83899	age15_	height155_163
gelding	19	dressage	advanced	162	.	Lunge left	3	21	9.88138	9.60517	16.8169	8.04461	17	8	-14.6406	3.21414	1.06825	4.59377	142	19.5051	363	0.875	0.32	162	19	dressage	dressage	advanced	gelding	gelding	14.6406	1.06825	9.88138	16.8169	1.95609	1.01664	1.77298	2.02505	age15_	height155_163
gelding	14	.	novel	160	hard	Straight line	17	13	-0.595334	5.92842	1.27223	6.94888	17.5	12.5	-4.71486	2.62134	2.87994	3.65253	383	1.40464	364	0.433333	0.416667	160	14			novel	gelding	gelding	4.71486	2.87994	0.595334	1.27223	1.47356	1.3027	0.878396	1.06204	age11_15	height155_163
gelding	14	.	novel	160	soft	Lunge right	11	27	2.41419	4.22611	6.19063	4.6783	34.5	2.5	-4.54954	2.85455	-5.43968	2.99304	384	6.64471	365	0.710526	0.0675676	160	14			novel	gelding	gelding	4.54954	5.43968	2.41419	6.19063	1.46047	1.52719	1.2465	1.57737	age11_15	height155_163
gelding	14	.	novel	160	soft	Lunge left	33	3	-11.0381	7.61439	-17.2781	6.6939	21.5	13.5	-9.02166	2.0034	2.11057	2.32976	385	20.503	366	0.0833333	0.385714	160	14			novel	gelding	gelding	9.02166	2.11057	11.0381	17.2781	1.73309	1.20531	1.82274	2.0388	age11_15	height155_163
gelding	11	showjumping	novel	172	hard	Straight line	23	8	-5.22243	8.73935	-2.06984	9.9887	23.5	7.5	0.335788	3.15417	-4.39094	2.24379	587	5.61765	367	0.258065	0.241935	172	11	showjump	showjump	novel	gelding	gelding	0.335788	4.39094	5.22243	2.06984	0.761231	1.44757	1.51171	1.19946	age11_15	height171_
gelding	11	showjumping	novel	172	soft	Lunge right	12	36	4.39038	6.25678	4.02255	11.525	24.5	24.5	8.57825	3.20998	-8.96704	3.47577	588	5.95453	368	0.75	0.5	172	11	showjump	showjump	novel	gelding	gelding	8.57825	8.96704	4.39038	4.02255	1.71139	1.73046	1.44752	1.4162	age11_15	height171_
gelding	11	showjumping	novel	172	soft	Lunge left	34	6	-6.01212	4.9498	-0.697515	8.39848	38.5	3.5	-6.35828	1.99493	-2.46027	3.09246	589	6.05245	369	0.15	0.0833333	172	11	showjump	showjump	novel	gelding	gelding	6.35828	2.46027	6.01212	0.697515	1.58794	1.25241	1.56587	0.913878	age11_15	height171_
gelding	12	allround	novel	168	hard	Straight line	1	15	12.0173	7.22718	0.673625	8.9777	12.5	3.5	-3.73706	2.50529	-0.316632	2.34131	404	12.0361	370	0.9375	0.21875	168	12	allround	allround	novel	gelding	gelding	3.73706	0.316632	12.0173	0.673625	1.39038	0.750134	1.86188	0.905951	age11_15	height163_171
gelding	12	allround	novel	168	soft	Lunge left	0	35	34.4222	8.61331	22.0337	11.7165	31	4	-5.67267	3.58623	-4.41765	3.84208	405	40.8702	371	1	0.114286	168	12	allround	allround	novel	gelding	gelding	5.67267	4.41765	34.4222	22.0337	1.54329	1.44977	2.4222	2.16657	age11_15	height163_171
gelding	12	allround	novel	168	soft	Lunge right	20	2	-7.03635	7.0965	-0.117452	4.96298	27.5	3.5	-3.58772	3.98924	-7.1696	4.03157	406	7.03733	372	0.0909091	0.112903	168	12	allround	allround	novel	gelding	gelding	3.58772	7.1696	7.03635	0.117452	1.37627	1.63634	1.62868	0.585417	age11_15	height163_171
gelding	18	dressage	intermediate	160	hard	Straight line	23	10	-1.37114	3.09468	0.427998	7.3063	20	14	-3.12439	2.70426	1.80519	2.92972	182	1.43639	373	0.30303	0.411765	160	18	dressage	dressage	intermed	gelding	gelding	3.12439	1.80519	1.37114	0.427998	1.32951	1.15913	1.08211	0.808836	age15_	height155_163
gelding	18	dressage	intermediate	160	soft	Lunge right	9	40	2.46704	2.43745	-0.321859	2.74188	11	38	0.319978	1.47826	2.53965	1.63539	183	2.48795	374	0.816327	0.77551	160	18	dressage	dressage	intermed	gelding	gelding	0.319978	2.53965	2.46704	0.321859	0.752108	1.26239	1.25327	0.75321	age15_	height155_163
gelding	18	dressage	intermediate	160	soft	Lunge left	37	1	-4.33505	1.98668	-1.39112	3.6962	26.5	11.5	-3.67363	2.71618	0.567145	2.44808	184	4.55279	375	0.0263158	0.302632	160	18	dressage	dressage	intermed	gelding	gelding	3.67363	0.567145	4.33505	1.39112	1.38444	0.867808	1.44294	1.08603	age15_	height155_163
stallion	14	dressage	advanced	170	hard	Straight line	17	17	0.765684	4.96266	2.60414	4.63004	19	16	-6.07955	2.24321	4.79045	3.21635	122	2.71438	376	0.5	0.457143	170	14	dressage	dressage	advanced	stallion	gelding	6.07955	4.79045	0.765684	2.60414	1.57025	1.47943	0.935432	1.27033	age11_15	height163_171
stallion	14	dressage	advanced	170	soft	Lunge right	6	27	3.90689	5.21405	3.23024	7.84989	14.5	18.5	6.69064	2.52911	-4.56458	3.71148	123	5.06934	377	0.818182	0.560606	170	14	dressage	dressage	advanced	stallion	gelding	6.69064	4.56458	3.90689	3.23024	1.6083	1.46167	1.40591	1.34063	age11_15	height163_171
stallion	14	dressage	advanced	170	soft	Lunge left	9	28	2.17684	4.40516	1.5484	4.58202	19	18	-5.64721	2.35251	4.99159	2.53729	124	2.67137	378	0.756757	0.486486	170	14	dressage	dressage	advanced	stallion	gelding	5.64721	4.99159	2.17684	1.5484	1.54155	1.49472	1.21467	1.1155	age11_15	height163_171
gelding	4	dressage	novel	.	soft	Lunge left	19	28	0.241239	19.7263	-14.4836	19.8408	22.5	23.5	-9.18318	5.84565	18.0508	6.50449	443	14.4856	379	0.595745	0.51087		4	dressage	dressage	novel	gelding	gelding	9.18318	18.0508	0.241239	14.4836	1.7408	2.06122	0.700829	1.95083	age_6
gelding	4	dressage	novel	.	hard	Straight line	7	8	-1.6821	6.67046	-1.801	10.3977	7.5	17.5	-1.04706	5.2944	10.9548	6.70082	444	2.46436	380	0.533333	0.7		4	dressage	dressage	novel	gelding	gelding	1.04706	10.9548	1.6821	1.801	1.01156	1.81929	1.13884	1.15845	age_6
gelding	4	dressage	novel	.	soft	Lunge right	29	36	1.22912	17.2377	-10.4906	13.676	14.5	50.5	7.6519	4.60464	-0.132595	5.13723	445	10.5624	381	0.553846	0.776923		4	dressage	dressage	novel	gelding	gelding	7.6519	0.132595	1.22912	10.4906	1.66319	0.603437	1.05293	1.7997	age_6
gelding	15	dressage	intermediate	166	soft	Lunge left	0	70	34.8135	21.5366	4.54517	16.2371	50.5	18.5	-12.6209	2.64587	0.331969	3.38303	665	35.109	382	1	0.268116	166	15	dressage	dressage	intermed	gelding	gelding	12.6209	0.331969	34.8135	4.54517	1.88483	0.759057	2.42905	1.46012	age11_15	height163_171
gelding	15	dressage	intermediate	166	hard	Straight line	0	20	23.899	6.49369	3.24193	5.21669	15	5	-1.76939	1.55096	-0.179921	2.17877	666	24.1179	383	1	0.25	166	15	dressage	dressage	intermed	gelding	gelding	1.76939	0.179921	23.899	3.24193	1.15334	0.651284	2.21103	1.34184	age11_15	height163_171
gelding	15	dressage	intermediate	166	soft	Lunge right	0	34	25.2388	6.79181	-7.35415	6.24208	17	16	7.20483	3.06518	-9.0401	3.38106	667	26.2884	384	1	0.484848	166	15	dressage	dressage	intermed	gelding	gelding	7.20483	9.0401	25.2388	7.35415	1.63835	1.73398	2.24139	1.64677	age11_15	height163_171
mare	13	dressage	intermediate	165	soft	Straight line	3	22	10.0307	7.90677	-6.03874	7.00858	22.5	2.5	-4.36655	3.28426	-3.85868	2.40697	164	11.7082	388	0.88	0.1	165	13	dressage	dressage	intermed	mare	mare	4.36655	3.85868	10.0307	6.03874	1.44555	1.40155	1.77964	1.5676	age11_15	height163_171
mare	13	dressage	intermediate	165	soft	Lunge right	2	58	8.78058	4.12344	-0.577802	5.77287	31	31	8.54266	5.04479	-7.22387	2.26362	165	8.79957	389	0.966667	0.5	165	13	dressage	dressage	intermed	mare	mare	8.54266	7.22387	8.78058	0.577802	1.70961	1.63943	1.7214	0.871856	age11_15	height163_171
mare	13	dressage	intermediate	165	soft	Lunge left	23	38	1.50385	5.52192	-10.5337	5.14076	41.5	21.5	-15.2749	2.04969	0.762583	2.24541	166	10.6405	390	0.622951	0.34127	165	13	dressage	dressage	intermed	mare	mare	15.2749	0.762583	1.50385	10.5337	1.97695	0.934484	1.10739	1.80154	age11_15	height163_171
gelding	6	dressage	novel	170	hard	Straight line	14	18	0.741454	3.73441	2.47564	4.79344	15.5	16.5	5.45249	2.2373	-4.31078	2.67833	269	2.58429	391	0.5625	0.515625	170	6	dressage	dressage	novel	gelding	gelding	5.45249	4.31078	0.741454	2.47564	1.52809	1.44092	0.927942	1.25436	age6_10	height163_171
gelding	6	dressage	novel	170	soft	Lunge right	58	1	-8.39374	3.83668	-6.78163	6.2127	2.5	56.5	9.90905	2.95386	2.63958	2.44311	270	10.791	392	0.0169492	0.957627	170	6	dressage	dressage	novel	gelding	gelding	9.90905	2.63958	8.39374	6.78163	1.77422	1.27463	1.70211	1.61374	age6_10	height163_171
gelding	6	dressage	novel	170	soft	Lunge left	15	15	0.473724	3.15223	6.87504	7.10347	26.5	2.5	-3.38908	2.93486	-6.27966	2.78303	271	6.89134	393	0.5	0.0862069	170	6	dressage	dressage	novel	gelding	gelding	3.38908	6.27966	0.473724	6.87504	1.35681	1.58301	0.829624	1.61927	age6_10	height163_171
mare	13	dressage	novel	168	hard	Straight line	2	18	7.62416	5.83063	-3.50956	6.81475	7.5	12.5	4.09079	2.61181	-2.44032	2.90169	185	8.39314	394	0.9	0.625	168	13	dressage	dressage	novel	mare	mare	4.09079	2.44032	7.62416	3.50956	1.42217	1.24986	1.66168	1.36872	age11_15	height163_171
mare	13	dressage	novel	168	soft	Lunge right	59	0	-11.7456	3.92869	-10.4837	4.34095	26.5	31.5	8.73133	2.95518	-3.54946	2.86251	186	15.7438	395	0	0.543103	168	13	dressage	dressage	novel	mare	mare	8.73133	3.54946	11.7456	10.4837	1.71898	1.37259	1.85127	1.79941	age11_15	height163_171
mare	13	dressage	novel	168	soft	Lunge left	1	74	9.6953	4.98571	-4.64776	5.22918	7.5	66.5	4.65651	2.49114	3.14839	2.63939	187	10.7518	396	0.986667	0.898649	168	13	dressage	dressage	novel	mare	mare	4.65651	3.14839	9.6953	4.64776	1.46898	1.33205	1.76458	1.46829	age11_15	height163_171
mare	11	dressage	advanced	170	soft	Straight line	6	9	0.64062	8.51725	-0.286026	16.1969	15	0	-5.40065	3.2806	-10.4722	4.90866	641	0.701573	397	0.6	0	170	11	dressage	dressage	advanced	mare	mare	5.40065	10.4722	0.64062	0.286026	1.52444	1.79891	0.894644	0.73131	age11_15	height163_171
mare	11	dressage	advanced	170	soft	Lunge left	14	25	1.49995	12.5189	-0.183266	18.4694	33	6	-15.1969	6.85134	-2.77577	5.82948	642	1.5111	398	0.641026	0.153846	170	11	dressage	dressage	advanced	mare	mare	15.1969	2.77577	1.49995	0.183266	1.97442	1.29076	1.10667	0.65429	age11_15	height163_171
mare	11	dressage	advanced	170	soft	Lunge right	18	21	1.04587	8.73879	-6.42577	10.0602	19.5	19.5	6.93079	3.75358	-6.56429	4.5294	643	6.51033	399	0.538462	0.5	170	11	dressage	dressage	advanced	mare	mare	6.93079	6.56429	1.04587	6.42577	1.62254	1.60065	1.01128	1.59214	age11_15	height163_171
gelding	7	showjumping	intermediate	165	hard	Straight line	0	25	34.4103	17.681	10.1966	11.7012	8.5	16.5	7.21823	1.7835	-1.22895	2.5223	74	35.8893	400	1	0.66	165	7	showjump	showjump	intermed	gelding	gelding	7.21823	1.22895	34.4103	10.1966	1.63911	1.05289	2.42199	1.78696	age6_10	height163_171
gelding	8	showjumping	intermediate	165	soft	Lunge left	3	65	13.5259	7.68549	4.05465	8.65195	26.5	45.5	-0.363709	2.54022	4.60794	3.26348	76	14.1206	401	0.955882	0.631944	165	8	showjump	showjump	intermed	gelding	gelding	0.363709	4.60794	13.5259	4.05465	0.776584	1.46513	1.91775	1.41902	age6_10	height163_171
gelding	9	showjumping	intermediate	165	soft	Lunge right	83	2	-34.5085	16.1054	-20.1635	10.779	1	86	19.6085	2.88264	4.08652	2.18451	75	39.9675	402	0.0235294	0.988506	165	9	showjump	showjump	intermed	gelding	gelding	19.6085	4.08652	34.5085	20.1635	2.10432	1.4218	2.42371	2.11905	age6_10	height163_171
gelding	16	dressage	advanced	172	soft	Straight line	14	0	-23.5958	5.23723	-1.43725	9.47926	11.5	2.5	-11.1536	3.33403	-1.97145	4.61154	632	23.6395	412	0	0.178571	172	16	dressage	dressage	advanced	gelding	gelding	11.1536	1.97145	23.5958	1.43725	1.82748	1.18494	2.20399	1.09492	age15_	height171_
gelding	16	dressage	advanced	172	soft	Lunge left	18	7	-5.77747	15.4227	-1.52999	10.4214	12	12	-16.1609	3.11195	15.2543	4.54857	633	5.97662	413	0.28	0.5	172	16	dressage	dressage	advanced	gelding	gelding	16.1609	15.2543	5.77747	1.52999	2.00501	1.97628	1.55037	1.11217	age15_	height171_
gelding	16	dressage	advanced	172	soft	Lunge right	26	0	-26.9515	7.46146	-5.72972	11.8183	7.5	17.5	10.4464	3.97788	-0.814995	5.43067	634	27.5538	414	0	0.7	172	16	dressage	dressage	advanced	gelding	gelding	10.4464	0.814995	26.9515	5.72972	1.7978	0.950142	2.27848	1.54715	age15_	height171_
gelding	15	dressage	intermediate	164	hard	Straight line	11	44	5.56909	6.1769	8.35829	7.39785	28	27	-2.21626	4.1697	1.83412	3.95747	590	10.0437	415	0.8	0.490909	164	15	dressage	dressage	intermed	gelding	gelding	2.21626	1.83412	5.56909	8.35829	1.22013	1.16374	1.53619	1.70031	age11_15	height163_171
gelding	15	dressage	intermediate	164	soft	Lunge right	5	52	5.15352	3.68205	10.7741	4.88211	5	51	2.7922	2.4482	2.7885	2.4106	591	11.9432	416	0.912281	0.910714	164	15	dressage	dressage	intermed	gelding	gelding	2.7922	2.7885	5.15352	10.7741	1.29267	1.29224	1.5067	1.81174	age11_15	height163_171
gelding	15	dressage	intermediate	164	soft	Lunge left	33	21	-0.829859	3.85174	5.42805	7.03253	34.5	18.5	-5.41756	3.39611	0.830281	3.09083	592	5.49112	417	0.388889	0.349057	164	15	dressage	dressage	intermed	gelding	gelding	5.41756	0.830281	0.829859	5.42805	1.52564	0.954567	0.954445	1.52637	age11_15	height163_171
mare	10	dressage	intermediate	164	soft	Straight line	25	0	-15.1371	4.31242	-17.1801	6.02722	22	3	-1.76467	2.57793	-4.65283	2.34976	287	22.8973	418	0	0.12	164	10	dressage	dressage	intermed	mare	mare	1.76467	4.65283	15.1371	17.1801	1.15257	1.46869	1.97247	2.0359	age6_10	height163_171
mare	10	dressage	intermediate	164	soft	Lunge right	9	69	5.12807	5.48575	-0.492144	5.22367	39	39	4.49367	2.52903	-3.46386	2.31351	288	5.15163	419	0.884615	0.5	164	10	dressage	dressage	intermed	mare	mare	4.49367	3.46386	5.12807	0.492144	1.45596	1.36424	1.50483	0.837574	age6_10	height163_171
mare	10	dressage	intermediate	164	soft	Lunge left	46	0	-16.8312	4.94673	-5.59625	7.21899	43	2	-8.87704	2.72991	-4.04299	3.08984	289	17.7371	420	0	0.0444444	164	10	dressage	dressage	intermed	mare	mare	8.87704	4.04299	16.8312	5.59625	1.7261	1.418	2.02548	1.53806	age6_10	height163_171
gelding	15	dressage	intermediate	166	hard	Straight line	23	17	-2.59616	7.24725	-13.4843	6.82548	8.5	31.5	0.268711	4.09941	7.39803	3.34688	593	13.732	421	0.425	0.7875	166	15	dressage	dressage	intermed	gelding	gelding	0.268711	7.39803	2.59616	13.4843	0.719982	1.64922	1.26935	1.91627	age11_15	height163_171
gelding	15	dressage	intermediate	166	soft	Lunge right	50	2	-7.54593	5.75004	-16.4272	5.81389	0	51	5.93516	2.48521	5.34545	2.43174	594	18.0774	422	0.0384615	1	166	15	dressage	dressage	intermed	gelding	gelding	5.93516	5.34545	7.54593	16.4272	1.56084	1.52053	1.6574	2.01322	age11_15	height163_171
gelding	15	dressage	intermediate	166	soft	Lunge left	13	37	1.6176	3.72184	-3.0981	4.83219	23.5	25.5	-5.17014	2.44245	4.70355	1.46246	595	3.49497	423	0.74	0.520408	166	15	dressage	dressage	intermed	gelding	gelding	5.17014	4.70355	1.6176	3.0981	1.50791	1.47267	1.12776	1.3267	age11_15	height163_171
mare	11	showjumping	intermediate	170	hard	Straight line	5	36	9.01716	7.56157	2.91599	8.07307	29	16	-1.3735	2.37998	-0.567138	4.609	596	9.47693	424	0.878049	0.355556	170	11	showjump	showjump	intermed	mare	mare	1.3735	0.567138	9.01716	2.91599	1.08257	0.867805	1.73288	1.30676	age11_15	height163_171
mare	11	showjumping	intermediate	170	soft	Lunge right	5	26	5.09432	6.14821	6.59101	5.57678	13.5	17.5	5.39824	2.0542	-2.69275	2.32917	597	8.33028	425	0.83871	0.564516	170	11	showjump	showjump	intermed	mare	mare	5.39824	2.69275	5.09432	6.59101	1.52427	1.281	1.50235	1.60228	age11_15	height163_171
mare	11	showjumping	intermediate	170	soft	Lunge left	4	38	13.5937	8.31012	-9.6687	8.99894	17	25	-3.04248	3.01825	4.49508	1.81565	598	16.6815	426	0.904762	0.595238	170	11	showjump	showjump	intermed	mare	mare	3.04248	4.49508	13.5937	9.6687	1.32071	1.45608	1.92015	1.76336	age11_15	height163_171
mare	21	eventing	intermediate	160	hard	Straight line	34	0	-16.1106	6.19362	-5.80669	4.40419	21	13	2.8563	3.74174	-5.58252	2.46485	86	17.1251	430	0	0.382353	160	21	event	allround	intermed	mare	mare	2.8563	5.58252	16.1106	5.80669	1.30002	1.53712	2.00345	1.55232	age15_	height155_163
mare	21	eventing	intermediate	160	soft	Lunge right	51	1	-11.6017	5.0825	-7.75277	5.42697	24	28	17.2369	5.13145	-6.01793	4.30295	87	13.9537	431	0.0192308	0.538462	160	21	event	allround	intermed	mare	mare	17.2369	6.01793	11.6017	7.75277	2.03758	1.56625	1.84557	1.66865	age15_	height155_163
mare	21	eventing	intermediate	160	soft	Lunge left	52	0	-16.4179	3.34961	2.72401	4.16216	48.5	2.5	-12.5389	3.20955	-3.20172	2.2255	88	16.6423	432	0	0.0490196	160	21	event	allround	intermed	mare	mare	12.5389	3.20172	16.4179	2.72401	1.88176	1.33766	2.01293	1.2847	age15_	height155_163
mare	8	dressage, showjumping	intermediate	164	hard	Straight line	4	18	5.83155	7.11587	-1.50575	6.5898	2.5	19.5	2.53005	3.77787	4.42259	2.67321	341	6.02281	433	0.818182	0.886364	164	8	dressage	dressage	intermed	mare	mare	2.53005	4.42259	5.83155	1.50575	1.2612	1.45017	1.55398	1.10774	age6_10	height163_171
mare	8	dressage, showjumping	intermediate	164	soft	Lunge right	7	35	5.23212	5.56563	1.24097	7.07868	3	38	7.28892	1.69857	3.03935	2.97576	342	5.37728	434	0.833333	0.926829	164	8	dressage	dressage	intermed	mare	mare	7.28892	3.03935	5.23212	1.24097	1.64311	1.32037	1.51241	1.05546	age6_10	height163_171
mare	8	dressage, showjumping	intermediate	166	soft	Lunge left	4	34	5.43859	4.72485	1.00612	5.0323	15.5	22.5	-1.7821	1.86204	9.53343	2.67418	343	5.53087	435	0.894737	0.592105	166	8	dressage	dressage	intermed	mare	mare	1.7821	9.53343	5.43859	1.00612	1.1554	1.75716	1.52711	1.00153	age6_10	height163_171
mare	9	showjumping	novel	162	soft	Lunge right	79	15	-12.3974	14.3843	17.3188	14.887	53	41	3.26362	4.73472	-7.32706	5.96205	11	21.2987	439	0.159574	0.43617	162	9	showjump	showjump	novel	mare	mare	3.26362	7.32706	12.3974	17.3188	1.34408	1.64525	1.87643	2.04	age6_10	height155_163
mare	9	showjumping	novel	163	hard	Straight line	21	13	-3.69073	9.09278	11.1422	8.20326	15.5	18.5	-2.56052	2.19506	5.69912	3.12836	12	11.7376	440	0.382353	0.544118	163	9	showjump	showjump	novel	mare	mare	2.56052	5.69912	3.69073	11.1422	1.26498	1.54508	1.38605	1.82702	age6_10	height163_171
mare	9	showjumping	novel	164	soft	Lunge left	28	61	7.75931	18.4644	6.86248	15.9529	44.5	44.5	-8.92077	4.91427	7.56907	3.91403	13	10.3586	441	0.685393	0.5	164	9	showjump	showjump	novel	mare	mare	8.92077	7.56907	7.75931	6.86248	1.72823	1.65867	1.669	1.61853	age6_10	height163_171
gelding	15	dressage	intermediate	165	.	Straight line	6	7	0.185257	5.92905	-1.0002	10.1057	11.5	1.5	-5.95175	3.67144	-3.81818	4.34079	53	1.01721	448	0.538462	0.115385	165	15	dressage	dressage	intermed	gelding	gelding	5.95175	3.81818	0.185257	1.0002	1.56193	1.39786	0.65606	1.00005	age11_15	height163_171
gelding	15	dressage	intermediate	165	.	Lunge right	13	14	0.396064	5.19487	1.90809	6.53701	22	6	-1.26575	5.101	-12.8214	3.6118	54	1.94876	449	0.518519	0.214286	165	15	dressage	dressage	intermed	gelding	gelding	1.26575	12.8214	0.396064	1.90809	1.06069	1.89227	0.793307	1.1753	age11_15	height163_171
gelding	15	dressage	intermediate	165	.	Lunge left	0	27	9.55533	6.13857	-19.4735	7.81343	18.5	8.5	-15.6223	3.59929	1.16573	3.19052	55	21.6915	450	1	0.314815	165	15	dressage	dressage	intermed	gelding	gelding	15.6223	1.16573	9.55533	19.4735	1.98809	1.03908	1.75817	2.10068	age11_15	height163_171
gelding	10	allround	novel	167	hard	Straight line	1	15	5.60064	5.31965	11.4998	7.56669	16	0	-3.75516	2.01019	-4.20781	1.68113	410	12.7911	451	0.9375	0	167	10	allround	allround	novel	gelding	gelding	3.75516	4.20781	5.60064	11.4998	1.39206	1.43223	1.53837	1.8415	age6_10	height163_171
gelding	10	allround	novel	167	soft	Lunge left	1	28	11.7963	8.11294	-8.93564	8.71013	30	0	-5.54205	2.20805	-8.17766	3.154	411	14.7986	452	0.965517	0	167	10	allround	allround	novel	gelding	gelding	5.54205	8.17766	11.7963	8.93564	1.53433	1.69105	1.85326	1.72895	age6_10	height163_171
gelding	10	allround	novel	167	soft	Lunge right	22	8	-3.81012	9.80805	-3.50344	7.66539	25	15	-2.86316	4.01346	-0.760877	5.5905	412	5.17602	453	0.266667	0.375	167	10	allround	allround	novel	gelding	gelding	2.86316	0.760877	3.81012	3.50344	1.3008	0.933961	1.39712	1.36812	age6_10	height163_171
mare	5	dressage	novel	173	hard	Straight line	18	7	-6.38802	11.0823	-6.78277	8.93141	12	14	8.59766	6.47274	-3.29582	4.03661	299	9.31733	466	0.28	0.538462	173	5	dressage	dressage	novel	mare	mare	8.59766	3.29582	6.38802	6.78277	1.71236	1.34738	1.5898	1.61381	age_6	height171_
mare	5	dressage	novel	173	soft	Lunge right	30	10	-8.25575	10.7488	-3.48299	9.25483	19.5	19.5	14.3491	5.98915	-11.0944	10.8227	300	8.9604	467	0.25	0.5	173	5	dressage	dressage	novel	mare	mare	14.3491	11.0944	8.25575	3.48299	1.94629	1.82505	1.69508	1.36612	age_6	height171_
mare	5	dressage	novel	173	soft	Lunge left	29	4	-7.44825	10.7157	1.43475	11.6628	15	19	-0.174597	4.45195	1.76479	4.53306	301	7.58518	468	0.121212	0.558824	173	5	dressage	dressage	novel	mare	mare	0.174597	1.76479	7.44825	1.43475	0.646411	1.15259	1.65201	1.09445	age_6	height171_
gelding	16	dressage	novel	170	hard	Straight line	18	12	-4.30214	13.6372	2.53058	7.42221	24.5	5.5	-1.46408	2.19479	-5.3712	4.43688	116	4.99122	484	0.4	0.183333	170	16	dressage	dressage	novel	gelding	gelding	1.46408	5.3712	4.30214	2.53058	1.1	1.52236	1.44019	1.26126	age15_	height163_171
gelding	16	dressage	novel	170	soft	Lunge right	1	25	9.94707	6.24425	-3.45502	4.80871	7	19	10.2206	3.40696	-0.478339	2.73504	117	10.53	485	0.961538	0.730769	170	16	dressage	dressage	novel	gelding	gelding	10.2206	0.478339	9.94707	3.45502	1.78801	0.831637	1.77592	1.36337	age15_	height163_171
gelding	16	dressage	novel	170	soft	Lunge left	0	27	12.9517	6.47231	-2.38351	5.06676	16	11	-1.45843	2.74546	-0.0914298	2.28835	118	13.1692	486	1	0.407407	170	16	dressage	dressage	novel	gelding	gelding	1.45843	0.0914298	12.9517	2.38351	1.09893	0.549885	1.89706	1.24252	age15_	height163_171
gelding	8	showjumping	novel	166	hard	Straight line	39	23	-4.26582	10.6395	3.55379	13.0806	19	43	-1.10498	3.77732	5.40286	3.24339	605	5.55218	505	0.370968	0.693548	166	8	showjump	showjump	novel	gelding	gelding	1.10498	5.40286	4.26582	3.55379	1.02527	1.5246	1.43715	1.37301	age6_10	height163_171
gelding	8	showjumping	novel	166	soft	Lunge right	30	18	-6.60786	14.8397	-3.02715	15.3191	16	31	16.906	3.84937	-1.03959	2.44577	606	7.26825	506	0.375	0.659574	166	8	showjump	showjump	novel	gelding	gelding	16.906	1.03959	6.60786	3.02715	2.02773	1.00975	1.6033	1.31904	age6_10	height163_171
gelding	8	showjumping	novel	166	soft	Lunge left	19	24	5.1474	13.5317	7.73656	10.4617	21.5	21.5	-11.9959	2.46327	6.16813	2.82378	607	9.29247	507	0.55814	0.5	166	8	showjump	showjump	novel	gelding	gelding	11.9959	6.16813	5.1474	7.73656	1.86105	1.57594	1.50625	1.66777	age6_10	height163_171
gelding	11	showjumping	intermediate	170	hard	Straight line	13	38	4.82983	6.38556	11.2097	8.8939	19.5	34.5	4.71612	4.62239	-1.36371	3.80477	608	12.206	520	0.745098	0.638889	170	11	showjump	showjump	intermed	gelding	gelding	4.71612	1.36371	4.82983	11.2097	1.47366	1.08064	1.48246	1.82978	age11_15	height163_171
gelding	11	showjumping	intermediate	170	soft	Lunge right	28	24	-1.73362	7.1021	3.0031	9.31091	22	29	7.99101	2.06143	-2.21605	2.78773	609	3.46757	521	0.461538	0.568627	170	11	showjump	showjump	intermed	gelding	gelding	7.99101	2.21605	1.73362	3.0031	1.68132	1.2201	1.14746	1.31641	age11_15	height163_171
gelding	11	showjumping	intermediate	170	soft	Lunge left	4	46	14.2298	10.4249	14.5836	11.6911	35	15	-2.46055	2.04644	-0.265899	3.14331	610	20.3756	522	0.92	0.3	170	11	showjump	showjump	intermed	gelding	gelding	2.46055	0.265899	14.2298	14.5836	1.25244	0.71809	1.94222	1.95419	age11_15	height163_171
gelding	6	dressage	intermediate	167	soft	Lunge right	33	0	-33.5243	10.9272	4.6949	11.2865	21	13	3.37763	3.5817	-15.5829	4.21419	302	33.8514	535	0	0.382353	167	6	dressage	dressage	intermed	gelding	gelding	3.37763	15.5829	33.5243	4.6949	1.35567	1.98684	2.40625	1.472	age6_10	height163_171
gelding	6	dressage	intermediate	167	soft	Lunge left	5	25	7.78862	11.0555	6.98148	13.7395	26	4	-23.608	4.8202	-3.1635	5.1761	303	10.4596	536	0.833333	0.133333	167	6	dressage	dressage	intermed	gelding	gelding	23.608	3.1635	7.78862	6.98148	2.20427	1.33365	1.67057	1.6255	age6_10	height163_171
gelding	6	dressage	intermediate	167	hard	Straight line	11	5	-4.47061	9.78739	16.7558	8.48261	15	1	-5.58282	2.64423	-3.0387	5.50743	304	17.3419	537	0.3125	0.0625	167	6	dressage	dressage	intermed	gelding	gelding	5.58282	3.0387	4.47061	16.7558	1.53714	1.3203	1.45409	2.02321	age6_10	height163_171
mare	12	dressage	intermediate	169	hard	Straight line	15	1	-9.70871	5.99086	0.934717	3.54072	3.5	12.5	4.78127	1.64495	0.372092	2.78421	644	9.7536	547	0.0625	0.78125	169	12	dressage	dressage	intermed	mare	mare	4.78127	0.372092	9.70871	0.934717	1.47872	0.781021	1.76519	0.983264	age11_15	height163_171
mare	12	dressage	intermediate	169	soft	Lunge right	46	0	-29.6195	9.73828	-19.3799	5.98248	22.5	22.5	14.3376	2.76728	-4.6236	2.16147	645	35.3962	548	0	0.5	169	12	dressage	dressage	intermed	mare	mare	14.3376	4.6236	29.6195	19.3799	1.94589	1.46638	2.33289	2.09816	age11_15	height163_171
mare	12	dressage	intermediate	169	soft	Lunge left	36	11	-5.16763	6.13804	0.516895	5.62434	32	14	-4.70356	2.14181	0.383724	1.95143	646	5.19342	549	0.234043	0.304348	169	12	dressage	dressage	intermed	mare	mare	4.70356	0.383724	5.16763	0.516895	1.47267	0.787054	1.50773	0.847912	age11_15	height163_171
mare	5	dressage	novel	165	.	Lunge right	7	10	2.54699	10.2644	18.2348	9.31478	8	10	14.5097	5.8444	-6.46219	5.94271	110	18.4118	556	0.588235	0.555556	165	5	dressage	dressage	novel	mare	mare	14.5097	6.46219	2.54699	18.2348	1.95171	1.59439	1.2633	2.06645	age_6	height163_171
mare	5	dressage	novel	165	.	Lunge left	2	18	14.4202	12.8261	20.7347	17.3103	14	7	-5.18175	3.6281	1.79373	5.01746	111	25.2561	557	0.9	0.333333	165	5	dressage	dressage	novel	mare	mare	5.18175	1.79373	14.4202	20.7347	1.50876	1.15728	1.94869	2.1339	age_6	height163_171
mare	5	dressage	novel	165	.	Straight line	1	20	10.1166	6.66894	11.237	10.4488	13	8	-1.65007	3.9664	-0.445871	4.76215	112	15.1201	558	0.952381	0.380952	165	5	dressage	dressage	novel	mare	mare	1.65007	0.445871	10.1166	11.237	1.13338	0.817151	1.78344	1.83089	age_6	height163_171
mare	6	dressage	intermediate	173	hard	Straight line	6	23	3.75191	6.42134	-4.35284	10.5551	9.5	19.5	-1.63668	4.53077	7.62869	3.15768	125	5.74666	562	0.793103	0.672414	173	6	dressage	dressage	intermed	mare	mare	1.63668	7.62869	3.75191	4.35284	1.13107	1.66193	1.39176	1.44442	age6_10	height171_
mare	6	dressage	intermediate	173	soft	Lunge right	4	26	4.25976	4.28475	-12.0805	6.71395	12.5	17.5	-0.245111	2.47629	0.770314	4.54236	126	12.8095	563	0.866667	0.583333	173	6	dressage	dressage	intermed	mare	mare	0.245111	0.770314	4.25976	12.0805	0.703624	0.936843	1.43663	1.86432	age6_10	height171_
mare	6	dressage	intermediate	173	soft	Lunge left	1	45	10.1951	4.16831	9.19163	5.66057	22.5	22.5	-5.74643	1.96184	8.01605	2.74048	127	13.7268	564	0.978261	0.5	173	6	dressage	dressage	intermed	mare	mare	5.74643	8.01605	10.1951	9.19163	1.54828	1.68264	1.78689	1.7412	age6_10	height171_
mare	15	allround	novel	150	hard	Straight line	35	8	-5.01953	5.22165	-0.181558	4.3654	15	29	4.92874	3.60858	-1.46902	3.01544	314	5.02281	565	0.186047	0.659091	150	15	allround	allround	novel	mare	mare	4.92874	1.46902	5.01953	0.181558	1.48999	1.10092	1.49681	0.65276	age11_15	height_155
mare	15	allround	novel	150	soft	Lunge right	39	25	-1.34295	5.48953	6.87736	6.7206	29.5	34.5	13.2972	5.99424	-4.4775	4.1435	315	7.00725	566	0.390625	0.539062	150	15	allround	allround	novel	mare	mare	13.2972	4.4775	1.34295	6.87736	1.90959	1.45465	1.0765	1.6194	age11_15	height_155
mare	15	allround	novel	150	soft	Lunge left	62	10	-5.80336	5.14424	-15.8728	5.63638	32	40	-4.00772	3.86012	7.58913	4.33388	316	16.9004	567	0.138889	0.555556	150	15	allround	allround	novel	mare	mare	4.00772	7.58913	5.80336	15.8728	1.4149	1.65977	1.5521	1.99601	age11_15	height_155
gelding	18	allround	novel	150	soft	Lunge right	1	50	17.5672	10.2984	0.679843	8.89879	25	25	18.5135	4.20477	-12.7077	4.43461	524	17.5804	571	0.980392	0.5	150	18	allround	allround	novel	gelding	gelding	18.5135	12.7077	17.5672	0.679843	2.0743	1.88806	2.04727	0.908034	age15_	height_155
gelding	18	allround	novel	150	hard	Straight line	7	18	3.90136	5.71392	-6.36854	5.23608	13.5	12.5	3.67706	2.95637	-9.77089	4.03753	525	7.46853	572	0.72	0.480769	150	18	allround	allround	novel	gelding	gelding	3.67706	9.77089	3.90136	6.36854	1.38476	1.76801	1.40541	1.58858	age15_	height_155
gelding	18	allround	novel	150	soft	Lunge left	38	12	-4.92306	13.9453	-5.63816	16.7056	28.5	21.5	-11.6843	5.0345	4.9301	4.7403	526	7.48501	573	0.24	0.43	150	18	allround	allround	novel	gelding	gelding	11.6843	4.9301	4.92306	5.63816	1.84885	1.49009	1.48956	1.54094	age15_	height_155
gelding	10	allround	novel	164	.	Straight line	9	2	-11.8574	10.1753	20.1451	11.1289	3	8	5.50186	2.98082	-1.14913	4.29069	50	23.3757	583	0.181818	0.727273	164	10	allround	allround	novel	gelding	gelding	5.50186	1.14913	11.8574	20.1451	1.53154	1.03536	1.85565	2.11857	age6_10	height163_171
gelding	10	allround	novel	164	.	Lunge left	2	22	17.4277	9.75007	-2.64333	14.8813	12.5	11.5	5.08356	3.61176	-4.3974	2.33982	51	17.627	584	0.916667	0.479167	164	10	allround	allround	novel	gelding	gelding	5.08356	4.3974	17.4277	2.64333	1.50156	1.4481	2.0432	1.27508	age6_10	height163_171
gelding	10	allround	novel	164	.	Lunge right	29	0	-40.7008	10.9397	27.2177	15.3928	2	26	11.4882	6.23448	6.29749	6.22681	52	48.9629	585	0	0.928571	164	10	allround	allround	novel	gelding	gelding	11.4882	6.29749	40.7008	27.2177	1.84104	1.58413	2.52581	2.28409	age6_10	height163_171
mare	18	allround	novel	163	hard	Straight line	0	36	7.1457	3.96494	7.94138	5.03484	11	27	0.131386	3.77262	4.44895	2.64895	212	10.683	598	1	0.710526	163	18	allround	allround	novel	mare	mare	0.131386	4.44895	7.1457	7.94138	0.602056	1.45233	1.63498	1.6787	age15_	height163_171
mare	18	allround	novel	163	soft	Lunge right	2	38	6.81295	4.56593	2.72561	8.59392	0	40	22.0995	4.91821	11.3453	3.27435	213	7.33793	599	0.95	1	163	18	allround	allround	novel	mare	mare	22.0995	11.3453	6.81295	2.72561	2.16818	1.83529	1.6156	1.28489	age15_	height163_171
mare	18	allround	novel	163	soft	Lunge left	4	38	5.83525	5.49879	14.622	5.41553	41	1	-20.5399	4.33906	-5.99438	3.45917	214	15.7434	600	0.904762	0.0238095	163	18	allround	allround	novel	mare	mare	20.5399	5.99438	5.83525	14.622	2.12887	1.56472	1.55423	1.95547	age15_	height163_171
gelding	22	allround	novel	165	soft	Straight line	2	22	8.72465	6.14183	0.604693	7.40827	22	1	-4.27978	2.59851	-4.8536	1.73268	215	8.74558	604	0.916667	0.0434783	165	22	allround	allround	novel	gelding	gelding	4.27978	4.8536	8.72465	0.604693	1.43832	1.48428	1.71865	0.881828	age15_	height163_171
gelding	22	allround	novel	165	soft	Lunge right	9	24	3.26557	5.74451	6.0013	5.14534	25.5	7.5	-0.491596	2.25241	-5.67056	1.72853	216	6.83224	605	0.727273	0.227273	165	22	allround	allround	novel	gelding	gelding	0.491596	5.67056	3.26557	6.0013	0.83734	1.54314	1.34428	1.56517	age15_	height163_171
gelding	22	allround	novel	165	soft	Lunge left	8	27	3.97853	5.07208	-2.86521	5.23599	33.5	1.5	-8.79994	2.58122	-3.49627	2.7265	217	4.90287	606	0.771429	0.0428571	165	22	allround	allround	novel	gelding	gelding	8.79994	3.49627	3.97853	2.86521	1.72234	1.36742	1.41231	1.30104	age15_	height163_171
mare	12	showjumping	intermediate	163	hard	Straight line	19	34	2.29741	10.2889	-3.77141	9.68202	48.5	6.5	-2.69534	3.41498	-9.68609	3.94373	620	4.41607	610	0.641509	0.118182	163	12	showjump	showjump	intermed	mare	mare	2.69534	9.68609	2.29741	3.77141	1.28131	1.76416	1.23115	1.39356	age11_15	height163_171
mare	12	showjumping	intermediate	163	soft	Lunge right	12	41	7.15387	10.2349	3.70951	11.0243	42.5	12.5	-1.37828	5.93343	-19.6458	6.23238	621	8.05843	611	0.773585	0.227273	163	12	showjump	showjump	intermed	mare	mare	1.37828	19.6458	7.15387	3.70951	1.08351	2.10532	1.63544	1.38781	age11_15	height163_171
mare	12	showjumping	intermediate	163	soft	Lunge left	30	25	1.81885	13.3496	4.83059	11.3414	46.5	10.5	-6.06697	3.82266	-1.85203	3.33705	622	5.16166	612	0.454545	0.184211	163	12	showjump	showjump	intermed	mare	mare	6.06697	1.85203	1.81885	4.83059	1.56943	1.16657	1.16131	1.48252	age11_15	height163_171
gelding	12	.	.	.	soft	Lunge right	40	27	-1.96545	14.3553	2.41996	11.0279	32	33	12.0289	4.64969	-8.84869	4.34164	311	3.11756	616	0.402985	0.507692		12				gelding	gelding	12.0289	8.84869	1.96545	2.41996	1.86233	1.72472	1.18404	1.24725	age11_15
gelding	12	.	.	.	soft	Lunge left	32	18	-4.35616	12.9362	-12.1019	11.8856	24.5	24.5	-16.5676	4.85275	10.7047	4.43442	312	12.862	617	0.36	0.5		12				gelding	gelding	16.5676	10.7047	4.35616	12.1019	2.01751	1.80881	1.44469	1.86515	age11_15
gelding	12	.	.	.	hard	Straight line	44	0	-28.7123	9.91669	-10.6796	7.58554	33	11	-1.84569	4.25442	-3.12888	3.10688	313	30.6341	618	0	0.25		12				gelding	gelding	1.84569	3.12888	28.7123	10.6796	1.16557	1.32999	2.31482	1.80775	age11_15
gelding	12	dressage	advanced	175	soft	Lunge right	30	2	-10.1133	8.76378	0.0195002	13.2056	7	26	3.31421	4.00973	2.88376	3.46823	305	10.1133	631	0.0625	0.787879	175	12	dressage	dressage	advanced	gelding	gelding	3.31421	2.88376	10.1133	0.0195002	1.34926	1.30314	1.7833	0.373688	age11_15	height171_
gelding	12	dressage	advanced	175	hard	Straight line	12	10	0.333406	5.91158	-3.39657	8.66378	11.5	15.5	-2.86814	3.96719	11.3725	6.16037	306	3.41289	632	0.454545	0.574074	175	12	dressage	dressage	advanced	gelding	gelding	2.86814	11.3725	0.333406	3.39657	1.30137	1.83639	0.759877	1.35756	age11_15	height171_
gelding	12	dressage	advanced	175	soft	Lunge left	13	15	2.80163	10.2611	-8.39228	8.52836	18	12	-7.54098	3.48588	3.31001	4.22819	307	8.84757	633	0.535714	0.4	175	12	dressage	dressage	advanced	gelding	gelding	7.54098	3.31001	2.80163	8.39228	1.65713	1.34883	1.29376	1.70204	age11_15	height171_
mare	5	eventing	novel	169	hard	Straight line	27	2	-8.51046	6.78204	0.364682	6.74972	9.5	19.5	-0.747879	5.69153	4.32347	3.7152	89	8.51827	634	0.0689655	0.672414	169	5	event	allround	novel	mare	mare	0.747879	4.32347	8.51046	0.364682	0.929946	1.44198	1.708	0.777103	age_6	height163_171
mare	5	eventing	novel	169	soft	Lunge right	4	55	6.17741	4.01377	1.56048	4.54784	10.5	47.5	5.61375	3.74583	1.58422	2.29213	90	6.37146	635	0.932203	0.818966	169	5	event	allround	novel	mare	mare	5.61375	1.58422	6.17741	1.56048	1.53926	1.1219	1.57653	1.11767	age_6	height163_171
mare	5	eventing	novel	169	soft	Lunge left	56	3	-6.33162	3.24835	-5.92919	4.19556	34.5	23.5	-10.8903	3.3724	1.74046	2.11341	91	8.67437	636	0.0508475	0.405172	169	5	event	allround	novel	mare	mare	10.8903	1.74046	6.33162	5.92919	1.8166	1.14859	1.58628	1.56045	age_6	height163_171
gelding	3	allround	novel	170	hard	Straight line	4	19	11.1985	12.6616	15.7096	8.6923	3.5	18.5	9.58107	6.74799	3.08985	3.74539	263	19.2925	637	0.826087	0.840909	170	3	allround	allround	novel	gelding	gelding	9.58107	3.08985	11.1985	15.7096	1.75936	1.32582	1.82932	1.99086	age_6	height163_171
gelding	3	allround	novel	170	soft	Lunge right	47	15	-4.91809	11.7577	9.84187	9.45995	1.5	59.5	17.0505	4.05185	6.09457	3.3241	264	11.0023	638	0.241935	0.97541	170	3	allround	allround	novel	gelding	gelding	17.0505	6.09457	4.91809	9.84187	2.03205	1.57122	1.48919	1.77121	age_6	height163_171
gelding	3	allround	novel	170	soft	Lunge left	1	56	20.1221	10.2955	1.637	6.85834	31	24	-7.68731	2.85182	3.72038	3.20243	265	20.1886	639	0.982456	0.436364	170	3	allround	allround	novel	gelding	gelding	7.68731	3.72038	20.1221	1.637	1.66511	1.38882	2.11796	1.13113	age_6	height163_171
gelding	15	dressage	intermediate	168	.	Straight line	0	19	15.2175	8.37002	-4.71571	8.45517	17.5	2.5	-4.05499	4.21442	-6.86612	6.08582	146	15.9314	646	1	0.125	168	15	dressage	dressage	intermed	gelding	gelding	4.05499	6.86612	15.2175	4.71571	1.41905	1.61874	1.97509	1.47362	age11_15	height163_171
gelding	15	dressage	intermediate	168	.	Lunge left	0	28	21.3976	11.4646	6.64294	11.1019	16	12	-2.22541	3.16634	0.834371	3.64516	147	22.4051	647	1	0.428571	168	15	dressage	dressage	intermed	gelding	gelding	2.22541	0.834371	21.3976	6.64294	1.22138	0.95574	2.15076	1.60543	age11_15	height163_171
gelding	15	dressage	intermediate	168	.	Lunge right	0	24	15.6404	8.23216	2.44258	8.83756	11	13	-0.290035	3.63968	1.30402	4.67619	148	15.83	648	1	0.541667	168	15	dressage	dressage	intermed	gelding	gelding	0.290035	1.30402	15.6404	2.44258	0.733859	1.06862	1.98867	1.25015	age11_15	height163_171
mare	10	showjumping	intermediate	171	hard	Straight line	22	32	1.92331	5.13604	-1.94576	5.48104	31.5	22.5	-3.91538	2.66478	1.67527	2.33834	626	2.73589	658	0.592593	0.416667	171	10	showjump	showjump	intermed	mare	mare	3.91538	1.67527	1.92331	1.94576	1.40667	1.13768	1.17764	1.18106	age6_10	height171_
mare	10	showjumping	intermediate	171	soft	Lunge right	30	20	-1.30467	3.49272	-3.00946	4.82394	12	37	3.32106	2.63671	0.053017	1.91619	627	3.28009	659	0.4	0.755102	171	10	showjump	showjump	intermed	mare	mare	3.32106	0.053017	1.30467	3.00946	1.34996	0.479848	1.06875	1.31711	age6_10	height171_
mare	10	showjumping	intermediate	171	soft	Lunge left	3	45	5.08597	3.64608	-10.7125	4.20687	31	16	-10.0574	2.12033	0.546931	1.71216	628	11.8585	660	0.9375	0.340426	171	10	showjump	showjump	intermed	mare	mare	10.0574	0.546931	5.08597	10.7125	1.78083	0.859969	1.50174	1.80914	age6_10	height171_
gelding	19	showjumping	novel	.	hard	Straight line	9	15	2.10998	7.95458	-7.10569	8.60803	11.5	10.5	-6.93253	5.90426	3.70872	2.86723	431	7.41235	4	0.625	0.477273		19	showjump	showjump	novel	gelding	gelding	6.93253	3.70872	2.10998	7.10569	1.62264	1.38773	1.20523	1.63268	age15_
gelding	19	showjumping	novel	.	soft	Lunge right	11	49	9.3222	11.1964	-13.4458	11.8208	22	37	4.91942	5.33521	-0.609322	4.80355	432	16.3614	5	0.816667	0.627119		19	showjump	showjump	novel	gelding	gelding	4.91942	0.609322	9.3222	13.4458	1.48929	0.883511	1.74735	1.9149	age15_
gelding	19	showjumping	novel	.	soft	Lunge left	14	39	8.2647	11.7008	12.4188	10.6272	26.5	26.5	-27.0376	6.71861	20.1422	7.13137	433	14.9175	6	0.735849	0.5		19	showjump	showjump	novel	gelding	gelding	27.0376	20.1422	8.2647	12.4188	2.2803	2.11849	1.69554	1.87724	age15_
gelding	9	showjumping	intermediate	163	soft	Lunge left	42	6	-11.0444	8.93923	-1.34325	9.61011	29.5	17.5	-5.28737	3.14537	1.06422	3.63983	317	11.1258	13	0.125	0.37234	163	9	showjump	showjump	intermed	gelding	gelding	5.28737	1.06422	11.0444	1.34325	1.51639	1.01568	1.823	1.07656	age6_10	height163_171
gelding	9	showjumping	intermediate	163	hard	Straight line	16	3	-11.1027	10.7474	-3.91478	9.95355	6.5	12.5	0.0336506	3.26975	2.25627	2.9647	318	11.7727	14	0.157895	0.657895	163	9	showjump	showjump	intermed	gelding	gelding	0.0336506	2.25627	11.1027	3.91478	0.4283	1.2256	1.8254	1.40662	age6_10	height163_171
gelding	9	showjumping	intermediate	163	soft	Lunge right	31	12	-5.24799	8.73933	7.29118	9.36541	9	34	3.54862	2.18773	1.81114	3.70521	319	8.98347	15	0.27907	0.790698	163	9	showjump	showjump	intermed	gelding	gelding	3.54862	1.81114	5.24799	7.29118	1.37251	1.16008	1.51356	1.64323	age6_10	height163_171
gelding	3	dressage	novel	167	soft	Lunge left	17	44	9.6519	28.1784	-6.9765	14.7432	51	45	-35.4171	6.64975	9.13435	6.4351	149	11.9093	19	0.721311	0.46875	167	3	dressage	dressage	novel	gelding	gelding	35.4171	9.13435	9.6519	6.9765	2.43951	1.73848	1.7626	1.62521	age_6	height163_171
gelding	3	dressage	novel	167	soft	Lunge right	29	31	3.82149	43.9658	39.0261	26.0087	27	33	31.3686	6.74296	-6.52949	5.68794	150	39.2128	20	0.516667	0.55	167	3	dressage	dressage	novel	gelding	gelding	31.3686	6.52949	3.82149	39.0261	2.36659	1.59853	1.39816	2.49942	age_6	height163_171
gelding	3	dressage	novel	167	hard	Straight line	2	20	11.9988	13.3776	0.0416821	5.40205	15.5	21.5	-3.58625	5.83962	7.28559	5.32846	151	11.9989	21	0.909091	0.581081	167	3	dressage	dressage	novel	gelding	gelding	3.58625	7.28559	11.9988	0.0416821	1.37613	1.64292	1.86116	0.451843	age_6	height163_171
gelding	6	dressage	novel	180	hard	Straight line	15	13	-1.32487	15.7509	-3.70769	13.7757	11	17	7.26009	5.92074	-4.81085	5.87317	218	3.93729	25	0.464286	0.607143	180	6	dressage	dressage	novel	gelding	gelding	7.26009	4.81085	1.32487	3.70769	1.64148	1.481	1.07286	1.38764	age6_10	height171_
gelding	6	dressage	novel	180	soft	Lunge right	63	12	-11.9203	11.4644	-6.85345	16.4828	36.5	37.5	15.2673	6.84101	-10.7486	5.70484	219	13.75	26	0.16	0.506757	180	6	dressage	dressage	novel	gelding	gelding	15.2673	10.7486	11.9203	6.85345	1.9767	1.81066	1.85811	1.618	age6_10	height171_
gelding	6	dressage	novel	180	soft	Lunge left	5	80	16.4603	12.0706	3.22844	11.2727	58.5	26.5	-1.18179	5.99259	-6.04059	6.60532	220	16.7739	27	0.941176	0.311765	180	6	dressage	dressage	novel	gelding	gelding	1.18179	6.04059	16.4603	3.22844	1.04264	1.56772	2.01423	1.34044	age6_10	height171_
stallion	4	allround	novel	162	hard	Straight line	5	24	4.39485	4.88851	1.08511	4.26237	14.5	14.5	1.44056	3.17536	-4.04262	3.70818	350	4.52683	28	0.827586	0.5	162	4	allround	allround	novel	stallion	gelding	1.44056	4.04262	4.39485	1.08511	1.09555	1.41797	1.44789	1.02063	age_6	height155_163
stallion	4	allround	novel	162	soft	Lunge left	2	61	13.5047	5.91214	3.90552	4.70854	61	2	-6.88899	3.28283	-4.56673	2.61087	351	14.058	29	0.968254	0.031746	162	4	allround	allround	novel	stallion	gelding	6.88899	4.56673	13.5047	3.90552	1.62009	1.46185	1.91699	1.40579	age_6	height155_163
stallion	4	allround	novel	162	soft	Lunge right	63	7	-11.5546	10.6385	1.00427	13.9638	27	43	10.5142	4.54922	-2.74787	3.25962	352	11.5982	30	0.1	0.614286	162	4	allround	allround	novel	stallion	gelding	10.5142	2.74787	11.5546	1.00427	1.80071	1.28751	1.84369	1.00106	age_6	height155_163
gelding	6	dressage	intermediate	.	soft	Lunge right	54	8	-18.9219	25.5174	-5.26655	14.7477	21.5	40.5	20.3365	6.27812	-3.26547	6.45924	221	19.6411	31	0.129032	0.653226		6	dressage	dressage	intermed	gelding	gelding	20.3365	3.26547	18.9219	5.26655	2.12358	1.34427	2.08565	1.51489	age6_10
gelding	6	dressage	intermediate	.	hard	Straight line	6	11	5.3977	39.2232	-2.03705	14.7885	6	12	12.2935	5.91651	-3.73885	6.50889	222	5.76929	32	0.647059	0.666667		6	dressage	dressage	intermed	gelding	gelding	12.2935	3.73885	5.3977	2.03705	1.87249	1.39054	1.52424	1.19468	age6_10
gelding	6	dressage	intermediate	.	soft	Lunge left	7	71	19.4889	16.4848	-16.9177	16.2171	30	47	0.700105	5.67219	3.74463	6.64263	223	25.8075	33	0.910256	0.61039		6	dressage	dressage	intermed	gelding	gelding	0.700105	3.74463	19.4889	16.9177	0.914726	1.39108	2.1011	2.02808	age6_10
mare	4	dressage	novel	166	soft	Lunge left	39	18	-8.09787	12.248	7.81846	9.4804	28.5	27.5	-19.8564	3.01202	6.91266	2.90677	254	11.2563	40	0.315789	0.491071	166	4	dressage	dressage	novel	mare	mare	19.8564	6.91266	8.09787	7.81846	2.11094	1.62148	1.68691	1.67217	age_6	height163_171
mare	4	dressage	novel	166	hard	Straight line	36	3	-12.4228	9.15732	1.25105	6.89126	22	17	-4.2105	3.5926	2.18519	4.98878	255	12.4857	41	0.0769231	0.435897	166	4	dressage	dressage	novel	mare	mare	4.2105	2.18519	12.4228	1.25105	1.43246	1.21583	1.87739	1.05759	age_6	height163_171
mare	4	dressage	novel	166	soft	Lunge right	62	4	-23.3253	16.8854	-2.00836	11.6381	9.5	56.5	8.93288	2.69022	2.05899	3.75575	256	23.4116	42	0.0606061	0.856061	166	4	dressage	dressage	novel	mare	mare	8.93288	2.05899	23.3253	2.00836	1.72881	1.19788	2.19764	1.19045	age_6	height163_171
mare	9	allround	novel	.	soft	Lunge right	1	68	10.9742	6.13581	-0.866761	4.72524	33	35	4.84601	1.9566	-3.58344	2.36227	17	11.0084	49	0.985507	0.514706		9	allround	allround	novel	mare	mare	4.84601	3.58344	10.9742	0.866761	1.4837	1.37586	1.82009	0.964883	age6_10
mare	9	allround	novel	.	soft	Lunge left	2	43	5.69079	4.84378	-0.608362	4.94188	42.5	1.5	-6.7392	2.45697	-3.30716	2.02992	18	5.72321	50	0.955556	0.0340909		9	allround	allround	novel	mare	mare	6.7392	3.30716	5.69079	0.608362	1.61121	1.34854	1.54452	0.883162	age6_10
mare	9	allround	novel	.	soft	Straight line	32	31	0.173312	5.84976	-6.62986	5.94774	47.5	15.5	-0.698659	2.48273	-4.68823	3.67377	19	6.63213	51	0.492063	0.246032		9	allround	allround	novel	mare	mare	0.698659	4.68823	0.173312	6.62986	0.914253	1.47147	0.645219	1.60463	age6_10
mare	4	dressage	novel	160	soft	Lunge left	38	16	-6.67493	12.0886	8.60554	13.0701	28.5	23.5	0.322366	3.69372	-0.891554	5.2327	23	10.8908	58	0.296296	0.451923	160	4	dressage	dressage	novel	mare	mare	0.322366	0.891554	6.67493	8.60554	0.753507	0.97171	1.60735	1.71275	age_6	height155_163
mare	4	dressage	novel	160	soft	Lunge right	20	21	1.03178	10.5105	3.77449	10.0516	22.5	22.5	7.58256	3.77593	-7.9724	5.43932	24	3.91297	59	0.512195	0.5	160	4	dressage	dressage	novel	mare	mare	7.58256	7.9724	1.03178	3.77449	1.65941	1.68034	1.00785	1.39385	age_6	height155_163
mare	4	dressage	novel	160	hard	Straight line	27	14	-3.31931	10.5019	1.15574	10.9913	22	21	4.16434	3.04733	-5.30912	5.14939	25	3.51476	60	0.341463	0.488372	160	4	dressage	dressage	novel	mare	mare	4.16434	5.30912	3.31931	1.15574	1.42852	1.51794	1.34978	1.03685	age_6	height155_163
gelding	5	allround	novel	164	hard	Straight line	37	22	-2.26765	8.6227	1.83105	8.43716	37	21	0.939408	2.80263	-3.69224	3.53531	242	2.91461	61	0.372881	0.362069	164	5	allround	allround	novel	gelding	gelding	0.939408	3.69224	2.26765	1.83105	0.984495	1.38619	1.22714	1.16326	age_6	height163_171
gelding	5	allround	novel	164	soft	Lunge right	36	17	-9.50119	13.8008	-4.7947	11.4196	33	20	2.37129	5.48461	-5.93987	4.19308	243	10.6425	62	0.320755	0.377358	164	5	allround	allround	novel	gelding	gelding	2.37129	5.93987	9.50119	4.7947	1.24093	1.56115	1.75568	1.47976	age_6	height163_171
gelding	5	allround	novel	164	soft	Lunge left	20	20	1.46827	9.21719	1.49345	10.5415	32.5	7.5	-2.48786	3.89595	-4.13142	4.65362	244	2.09433	63	0.5	0.1875	164	5	allround	allround	novel	gelding	gelding	2.48786	4.13142	1.46827	1.49345	1.2559	1.42569	1.10078	1.10547	age_6	height163_171
mare	11	showjumping	novel	168	soft	Lunge right	34	9	-5.75889	8.11688	24.6072	8.01934	11	31	0.385901	3.36015	9.62487	3.10901	458	25.2721	67	0.209302	0.738095	168	11	showjump	showjump	novel	mare	mare	0.385901	9.62487	5.75889	24.6072	0.788168	1.76136	1.54912	2.22723	age11_15	height163_171
mare	11	showjumping	novel	168	soft	Lunge left	43	2	-20.7844	14.2707	-7.22566	9.11156	22	22	-15.428	3.61833	15.5915	4.77256	459	22.0046	68	0.0444444	0.5	168	11	showjump	showjump	novel	mare	mare	15.428	15.5915	20.7844	7.22566	1.98188	1.98711	2.13518	1.63953	age11_15	height163_171
mare	11	showjumping	novel	168	hard	Straight line	31	3	-8.56855	6.59808	13.606	7.94239	16.5	17.5	-5.32831	3.26678	14.3494	4.179	460	16.0793	69	0.0882353	0.514706	168	11	showjump	showjump	novel	mare	mare	5.32831	14.3494	8.56855	13.606	1.51931	1.9463	1.71091	1.92058	age11_15	height163_171
gelding	12	allround	novel	.	soft	Lunge left	0	43	45.8213	17.1442	48.9824	18.0533	32.5	9.5	-13.7646	4.38924	-0.889655	5.29798	461	67.0736	76	1	0.22619		12	allround	allround	novel	gelding	gelding	13.7646	0.889655	45.8213	48.9824	1.92615	0.971193	2.60176	2.64551	age11_15
gelding	12	allround	novel	.	hard	Straight line	16	9	-4.84533	24.2149	-4.4084	27.4257	7	18	0.811841	7.50421	9.48094	9.38897	462	6.55067	77	0.36	0.72		12	allround	allround	novel	gelding	gelding	0.811841	9.48094	4.84533	4.4084	0.949222	1.75474	1.48365	1.44901	age11_15
gelding	12	allround	novel	.	soft	Lunge right	61	2	-31.5874	15.5522	-15.9972	20.3471	9.5	53.5	18.5322	5.41266	2.93766	5.31819	463	35.4073	78	0.031746	0.849206		12	allround	allround	novel	gelding	gelding	18.5322	2.93766	31.5874	15.9972	2.07483	1.30918	2.37071	1.99991	age11_15
gelding	12	showjumping	advanced	170	soft	Lunge left	1	39	22.4782	9.84749	-2.71971	11.3742	24.5	14.5	-6.91146	2.58387	2.41036	5.50355	320	22.6421	79	0.975	0.371795	170	12	showjump	showjump	advanced	gelding	gelding	6.91146	2.41036	22.4782	2.71971	1.62141	1.24601	2.17741	1.28419	age11_15	height163_171
gelding	12	showjumping	advanced	170	soft	Lunge right	0	46	14.5995	5.73232	6.79412	9.25	22	23	7.31451	3.09401	-8.88255	3.18886	321	16.1029	80	1	0.511111	170	12	showjump	showjump	advanced	gelding	gelding	7.31451	8.88255	14.5995	6.79412	1.64455	1.72637	1.95472	1.61448	age11_15	height163_171
gelding	12	showjumping	advanced	170	hard	Straight line	1	17	7.79007	6.32514	10.5788	7.09064	12	6	0.765977	2.20663	-3.89274	2.94314	322	13.1376	81	0.944444	0.333333	170	12	showjump	showjump	advanced	gelding	gelding	0.765977	3.89274	7.79007	10.5788	0.935522	1.40464	1.67065	1.80347	age11_15	height163_171
gelding	14	allround	novel	165	hard	Straight line	19	15	-1.09149	5.69001	1.88153	5.61013	28.5	7.5	-2.26866	3.4961	-3.99393	3.97355	197	2.1752	82	0.441176	0.208333	165	14	allround	allround	novel	gelding	gelding	2.26866	3.99393	1.09149	1.88153	1.22728	1.41368	1.02213	1.17119	age11_15	height163_171
gelding	14	allround	novel	165	soft	Lunge right	4	35	3.47121	3.03667	2.11297	3.21377	18.5	19.5	5.13494	2.69385	-4.10054	2.20083	198	4.06373	83	0.897436	0.513158	165	14	allround	allround	novel	gelding	gelding	5.13494	4.10054	3.47121	2.11297	1.50534	1.42302	1.36496	1.20566	age11_15	height163_171
gelding	14	allround	novel	165	soft	Lunge left	33	2	-5.29325	3.66587	-2.37282	4.33039	25	9	-6.97865	1.95071	-0.0587025	2.40482	199	5.80076	84	0.0571429	0.264706	165	14	allround	allround	novel	gelding	gelding	6.97865	0.0587025	5.29325	2.37282	1.62534	0.492226	1.51681	1.24113	age11_15	height163_171
gelding	11	showjumping	advanced	164	hard	Straight line	12	9	-2.38142	5.73711	0.98205	6.0308	21	0	-6.09344	3.44329	-14.1685	2.93031	422	2.57596	91	0.428571	0	164	11	showjump	showjump	advanced	gelding	gelding	6.09344	14.1685	2.38142	0.98205	1.57114	1.94013	1.24225	0.995482	age11_15	height163_171
gelding	11	showjumping	advanced	164	soft	Lunge right	24	28	0.375744	4.06358	6.8313	4.15619	25.5	25.5	9.09503	2.11778	-12.4544	2.75909	423	6.84163	92	0.538462	0.5	164	11	showjump	showjump	advanced	gelding	gelding	9.09503	12.4544	0.375744	6.8313	1.7366	1.87858	0.78293	1.61669	age11_15	height163_171
gelding	11	showjumping	advanced	164	soft	Lunge left	36	18	-2.8535	7.21689	-6.20435	5.08276	52.5	0.5	-21.4165	3.08969	-6.7962	2.45736	424	6.82909	93	0.333333	0.00943396	164	11	showjump	showjump	advanced	gelding	gelding	21.4165	6.7962	2.8535	6.20435	2.15123	1.61461	1.2997	1.57824	age11_15	height163_171
gelding	4	allround	novel	163	hard	Straight line	10	30	4.88908	7.31577	3.78795	7.12673	32.5	7.5	-3.72217	1.91008	-0.975896	2.66371	389	6.18479	97	0.75	0.1875	163	4	allround	allround	novel	gelding	gelding	3.72217	0.975896	4.88908	3.78795	1.38899	0.993919	1.48699	1.39509	age_6	height163_171
gelding	4	allround	novel	163	soft	Lunge left	45	36	-1.01649	19.8012	-7.44462	17.2689	69.5	9.5	-11.2753	3.57582	-3.32663	4.80485	390	7.51369	98	0.444444	0.120253	163	4	allround	allround	novel	gelding	gelding	11.2753	3.32663	1.01649	7.44462	1.83245	1.35052	1.0041	1.65181	age_6	height163_171
gelding	4	allround	novel	163	soft	Lunge right	42	41	2.30477	21.6917	-2.00636	18.9928	31.5	50.5	8.49305	4.0835	-2.3649	4.83761	391	3.05572	99	0.493976	0.615854	163	4	allround	allround	novel	gelding	gelding	8.49305	2.3649	2.30477	2.00636	1.70713	1.24009	1.23213	1.19015	age_6	height163_171
gelding	9	allround	novel	165	soft	Lunge right	30	25	0.609633	11.7744	12.0901	12.2304	24.5	29.5	28.8793	6.52801	-6.43074	4.65738	464	12.1055	109	0.454545	0.546296	165	9	allround	allround	novel	gelding	gelding	28.8793	6.43074	0.609633	12.0901	2.31818	1.59245	0.883623	1.86469	age6_10	height163_171
gelding	9	allround	novel	165	soft	Lunge left	19	27	-0.186511	15.5643	2.1095	11.3349	25	21	-34.2705	4.311	6.26792	4.29994	465	2.11773	110	0.586957	0.456522	165	9	allround	allround	novel	gelding	gelding	34.2705	6.26792	0.186511	2.1095	2.41953	1.58227	0.657167	1.20516	age6_10	height163_171
gelding	9	allround	novel	165	hard	Straight line	16	6	-9.32347	12.651	6.40333	5.11365	13.5	8.5	-5.86828	3.75675	6.03844	7.2014	466	11.3106	111	0.272727	0.386364	165	9	allround	allround	novel	gelding	gelding	5.86828	6.03844	9.32347	6.40333	1.55642	1.56759	1.74741	1.59075	age6_10	height163_171
mare	7	allround	novel	163	soft	Lunge right	45	10	-14.3453	16.1588	6.16146	13.4186	25	29	14.1064	3.76764	-7.89331	5.86128	467	15.6126	112	0.181818	0.537037	163	7	allround	allround	novel	mare	mare	14.1064	7.89331	14.3453	6.16146	1.938	1.67616	1.94616	1.57551	age6_10	height163_171
mare	7	allround	novel	163	soft	Lunge left	17	10	-4.85856	11.6719	-13.5031	16.5765	11	14	-0.739087	2.61098	4.65674	4.9067	468	14.3506	113	0.37037	0.56	163	7	allround	allround	novel	mare	mare	0.739087	4.65674	4.85856	13.5031	0.927201	1.469	1.48466	1.91694	age6_10	height163_171
mare	7	allround	novel	163	soft	Straight line	20	7	-9.27069	12.6846	-4.44965	10.0414	12.5	14.5	4.21313	3.234	-3.91183	3.89215	469	10.2832	114	0.259259	0.537037	163	7	allround	allround	novel	mare	mare	4.21313	3.91183	9.27069	4.44965	1.43269	1.40636	1.74493	1.45238	age6_10	height163_171
mare	13	allround	novel	165	soft	Lunge right	1	52	27.7723	11.1986	4.75091	14.2445	26.5	26.5	14.3651	3.79962	-11.2517	5.80813	470	28.1757	115	0.981132	0.5	165	13	allround	allround	novel	mare	mare	14.3651	11.2517	27.7723	4.75091	1.94683	1.83149	2.29563	1.47637	age11_15	height163_171
mare	13	allround	novel	165	hard	Straight line	10	9	1.13845	9.74961	-1.57717	10.0095	14.5	7.5	1.07089	3.70274	-7.86774	6.95399	471	1.94513	116	0.473684	0.340909	165	13	allround	allround	novel	mare	mare	1.07089	7.86774	1.13845	1.57717	1.01727	1.6748	1.03295	1.12065	age11_15	height163_171
mare	13	allround	novel	165	soft	Lunge left	23	22	0.327555	6.91551	-3.69677	7.21748	53	20	-6.19353	4.15239	-0.496448	4.49804	472	3.71125	117	0.488889	0.273973	165	13	allround	allround	novel	mare	mare	6.19353	0.496448	0.327555	3.69677	1.57756	0.839399	0.756521	1.38661	age11_15	height163_171
gelding	10	dressage	advanced	.	soft	Lunge left	4	25	10.0068	9.00177	-4.87574	5.63706	16.5	16.5	-3.5264	4.57151	3.68657	4.21097	437	11.1315	124	0.862069	0.5		10	dressage	dressage	advanced	gelding	gelding	3.5264	3.68657	10.0068	4.87574	1.37035	1.38566	1.77858	1.48597	age6_10
gelding	10	dressage	advanced	.	hard	Straight line	9	8	0.231803	7.2241	8.74069	8.37003	6	11	7.22198	2.83483	-1.95951	3.59816	438	8.74376	125	0.470588	0.647059		10	dressage	dressage	advanced	gelding	gelding	7.22198	1.95951	0.231803	8.74069	1.63932	1.18314	0.693873	1.71944	age6_10
gelding	10	dressage	advanced	.	soft	Lunge right	11	0	-22.1849	14.534	24.7325	6.68893	5.5	5.5	13.8039	5.65876	-13.9178	4.0811	439	33.2245	126	0	0.5		10	dressage	dressage	advanced	gelding	gelding	13.8039	13.9178	22.1849	24.7325	1.92753	1.93149	2.17027	2.23006	age6_10
gelding	6	allround	novel	168	hard	Straight line	8	29	2.81692	4.68381	-0.506427	8.89161	7.5	30.5	1.55855	4.22958	5.07084	4.14862	206	2.86208	160	0.783784	0.802632	168	6	allround	allround	novel	gelding	gelding	1.55855	5.07084	2.81692	0.506427	1.11733	1.50062	1.29552	0.843586	age6_10	height163_171
gelding	6	allround	novel	168	soft	Lunge right	1	40	9.8613	5.28963	-8.16855	4.96916	0	41	7.30193	2.41546	5.88876	2.81345	207	12.8051	161	0.97561	1	168	6	allround	allround	novel	gelding	gelding	7.30193	5.88876	9.8613	8.16855	1.64384	1.55778	1.77208	1.69058	age6_10	height163_171
gelding	6	allround	novel	168	soft	Lunge left	19	14	-1.18481	4.72296	-2.63077	3.63123	18	15	2.68325	2.15473	-7.10754	2.35233	208	2.88526	162	0.424242	0.454545	168	6	allround	allround	novel	gelding	gelding	2.68325	7.10754	1.18481	2.63077	1.27987	1.63279	1.04331	1.27356	age6_10	height163_171
mare	5	dressage	novel	164	hard	Straight line	32	6	-14.5779	20.3711	-1.75009	13.6378	19.5	17.5	3.59736	4.9839	-4.19575	3.98245	386	14.6826	181	0.157895	0.472973	164	5	dressage	dressage	novel	mare	mare	3.59736	4.19575	14.5779	1.75009	1.3772	1.43121	1.954	1.15018	age_6	height163_171
mare	5	dressage	novel	164	soft	Lunge right	16	20	-1.97328	14.7113	-9.9147	13.1975	18	18	11.7197	3.26877	-10.9472	5.92271	387	10.1092	182	0.555556	0.5	164	5	dressage	dressage	novel	mare	mare	11.7197	10.9472	1.97328	9.9147	1.85024	1.81897	1.18522	1.77447	age_6	height163_171
mare	5	dressage	novel	164	soft	Lunge left	26	23	4.42063	28.3296	-0.0499682	21.9869	25	24	-7.03225	4.85754	7.53479	8.92629	388	4.42091	183	0.469388	0.489796	164	5	dressage	dressage	novel	mare	mare	7.03225	7.53479	4.42063	0.0499682	1.62845	1.65679	1.45001	0.472796	age_6	height163_171
mare	7	showjumping	intermediate	169	hard	Straight line	0	18	11.0947	4.01536	0.284824	4.92809	5	13	-0.202248	3.13688	3.78618	3.11188	323	11.0984	184	1	0.722222	169	7	showjump	showjump	intermed	mare	mare	0.202248	3.78618	11.0947	0.284824	0.670611	1.39492	1.82507	0.73054	age6_10	height163_171
mare	7	showjumping	intermediate	169	soft	Lunge left	4	42	10.3167	9.67085	-5.27153	7.39743	29	17	-8.171	2.73114	2.61364	3.09316	324	11.5855	185	0.913043	0.369565	169	7	showjump	showjump	intermed	mare	mare	8.171	2.61364	10.3167	5.27153	1.69071	1.27149	1.79219	1.51525	age6_10	height163_171
mare	7	showjumping	intermediate	169	soft	Lunge right	0	39	16.1874	5.14877	9.13207	5.52287	11.5	26.5	6.55098	1.94789	-0.866564	2.75061	325	18.5857	186	1	0.697368	169	7	showjump	showjump	intermed	mare	mare	6.55098	0.866564	16.1874	9.13207	1.59984	0.964829	2.00583	1.73837	age6_10	height163_171
gelding	13	showjumping	novel	175	soft	Lunge left	33	28	0.281648	7.68836	2.66548	5.14696	33	28	-0.279663	2.24221	0.290571	2.77067	26	2.68032	205	0.459016	0.459016	175	13	showjump	showjump	novel	gelding	gelding	0.279663	0.290571	0.281648	2.66548	0.727208	0.734198	0.728495	1.27774	age11_15	height171_
gelding	13	showjumping	novel	175	soft	Lunge right	10	28	7.04611	8.90612	11.4358	6.13968	15.5	21.5	-2.08311	2.85258	5.52344	2.99354	27	13.4323	206	0.736842	0.581081	175	13	showjump	showjump	novel	gelding	gelding	2.08311	5.52344	7.04611	11.4358	1.20137	1.53304	1.62925	1.83894	age11_15	height171_
gelding	13	showjumping	novel	175	hard	Straight line	26	20	-3.15791	10.4189	4.27823	8.44512	18.5	25.5	-2.08713	3.33038	3.80997	2.85719	28	5.31748	207	0.434783	0.579545	175	13	showjump	showjump	novel	gelding	gelding	2.08713	3.80997	3.15791	4.27823	1.20195	1.39711	1.33306	1.43819	age11_15	height171_
mare	12	dressage	intermediate	167	soft	Lunge left	29	39	0.870698	5.78466	-8.27016	8.70913	33.5	33.5	-7.17946	2.4069	5.09693	2.06972	29	8.31587	208	0.573529	0.5	167	12	dressage	dressage	intermed	mare	mare	7.17946	5.09693	0.870698	8.27016	1.6369	1.50254	0.965977	1.69582	age11_15	height163_171
mare	12	dressage	intermediate	167	soft	Lunge right	18	23	0.505281	5.24711	-4.6183	7.20901	20	21	14.3509	2.63986	-4.13238	1.9379	30	4.64586	209	0.560976	0.512195	167	12	dressage	dressage	intermed	mare	mare	14.3509	4.13238	0.505281	4.6183	1.94634	1.42577	0.843108	1.46595	age11_15	height163_171
mare	12	dressage	intermediate	167	soft	Straight line	7	23	5.11023	5.67193	0.00595599	6.23733	4.5	25.5	4.59903	3.67773	1.69907	2.49879	31	5.11024	210	0.766667	0.85	167	12	dressage	dressage	intermed	mare	mare	4.59903	1.69907	5.11023	0.00595599	1.46442	1.1417	1.50352	0.277804	age11_15	height163_171
gelding	5	.	.	.	hard	Straight line	18	13	-0.808676	10.4444	6.64828	11.5984	8.5	22.5	8.95753	5.03828	-0.0101172	4.10371	8	6.69728	232	0.419355	0.725806		5				gelding	gelding	8.95753	0.0101172	0.808676	6.64828	1.73	0.317151	0.948295	1.60575	age_6
gelding	5	.	.	.	soft	Lunge right	14	40	3.63279	11.1688	17.2297	14.0754	25	29	21.2683	4.68491	-6.72392	4.79245	9	17.6086	233	0.740741	0.537037		5				gelding	gelding	21.2683	6.72392	3.63279	17.2297	2.1475	1.6103	1.38058	2.03737	age_6
gelding	5	.	.	.	soft	Lunge left	37	20	-5.23819	19.2851	-4.29383	16.0993	26	29	-3.94235	6.41371	7.21188	8.99518	10	6.77315	234	0.350877	0.527273		5				gelding	gelding	3.94235	7.21188	5.23819	4.29383	1.40909	1.63875	1.51285	1.4395	age_6
gelding	14	allround	novel	.	soft	Lunge left	52	0	-35.4894	12.9399	9.21721	12.8143	28.5	22.5	-10.1818	4.61587	6.15093	4.96646	476	36.6668	244	0	0.441176		14	allround	allround	novel	gelding	gelding	10.1818	6.15093	35.4894	9.21721	1.78631	1.57484	2.44076	1.74241	age11_15
gelding	14	allround	novel	.	hard	Straight line	25	0	-20.8079	9.45796	-0.582491	6.29596	21	4	-4.05912	4.39582	-4.5478	5.18021	477	20.816	245	0	0.16		14	allround	allround	novel	gelding	gelding	4.05912	4.5478	20.8079	0.582491	1.41941	1.46033	2.13578	0.873619	age11_15
gelding	14	allround	novel	.	soft	Lunge right	58	2	-27.6533	15.1536	-19.2121	13.519	29.5	29.5	8.17817	3.89739	-11.6934	5.47191	478	33.6721	246	0.0333333	0.5		14	allround	allround	novel	gelding	gelding	8.17817	11.6934	27.6533	19.2121	1.69108	1.84921	2.29317	2.0936	age11_15
mare	15	allround	novel	165	soft	Lunge right	41	19	-2.50102	6.365	10.2533	6.79625	33.5	25.5	2.30082	2.31971	-4.41242	2.7101	356	10.5539	253	0.316667	0.432203	165	15	allround	allround	novel	mare	mare	2.30082	4.41242	2.50102	10.2533	1.2316	1.44934	1.25756	1.78944	age11_15	height163_171
mare	15	allround	novel	165	soft	Lunge left	10	56	8.60477	8.80804	5.3743	8.40243	48.5	16.5	-4.6258	2.41041	-0.491564	2.75387	357	10.1452	254	0.848485	0.253846	165	15	allround	allround	novel	mare	mare	4.6258	0.491564	8.60477	5.3743	1.46655	0.837327	1.71271	1.52258	age11_15	height163_171
mare	15	allround	novel	165	hard	Straight line	25	19	-1.62943	6.25429	7.36493	6.40026	40.5	2.5	-4.09037	3.8086	-4.54727	4.633	358	7.54303	255	0.431818	0.0581395	165	15	allround	allround	novel	mare	mare	4.09037	4.54727	1.62943	7.36493	1.42213	1.46029	1.12982	1.64737	age11_15	height163_171
mare	13	dressage	novel	161	hard	Straight line	33	7	-12.2889	14.634	9.94977	11.2779	21.5	18.5	-3.9725	3.76063	5.78064	6.35452	224	15.8119	283	0.175	0.4625	161	13	dressage	dressage	novel	mare	mare	3.9725	5.78064	12.2889	9.94977	1.41178	1.55058	1.87231	1.77604	age11_15	height155_163
mare	13	dressage	novel	161	soft	Lunge left	91	3	-24.9444	13.1023	20.3911	13.5047	75.5	17.5	-8.90446	3.47562	-4.249	9.75343	225	32.2184	284	0.0319149	0.188172	161	13	dressage	dressage	novel	mare	mare	8.90446	4.249	24.9444	20.3911	1.72744	1.43573	2.23482	2.12501	age11_15	height155_163
mare	13	dressage	novel	161	soft	Lunge right	104	4	-18.0036	10.3402	-9.96868	11.264	68.5	39.5	2.56247	4.38064	-17.1595	7.74401	226	20.5792	285	0.037037	0.365741	161	13	dressage	dressage	novel	mare	mare	2.56247	17.1595	18.0036	9.96868	1.26522	2.03529	2.05987	1.77689	age11_15	height155_163
gelding	12	allround	novel	167	soft	Lunge left	44	8	-12.7312	17.1697	-9.26813	20.0503	10	41	1.1995	4.32669	8.75529	4.44843	479	15.7475	286	0.153846	0.803922	167	12	allround	allround	novel	gelding	gelding	1.1995	8.75529	12.7312	9.26813	1.04653	1.72016	1.88894	1.74481	age11_15	height163_171
gelding	12	allround	novel	167	hard	Straight line	11	7	1.31406	12.0814	9.2987	27.4229	4	14	5.88911	4.75828	0.868183	5.79537	480	9.39109	287	0.388889	0.777778	167	12	allround	allround	novel	gelding	gelding	5.88911	0.868183	1.31406	9.2987	1.5578	0.965279	1.07067	1.74625	age11_15	height163_171
gelding	12	allround	novel	167	soft	Lunge right	22	23	2.30917	15.1869	-9.34346	12.598	10	35	9.42594	4.73498	0.129611	4.58435	481	9.62458	288	0.511111	0.777778	167	12	allround	allround	novel	gelding	gelding	9.42594	0.129611	2.30917	9.34346	1.75219	0.600013	1.23272	1.74834	age11_15	height163_171
gelding	10	allround	novel	.	soft	Lunge right	43	4	-17.0603	10.8481	-2.25584	9.33395	5.5	40.5	4.46246	3.42571	4.53611	4.68406	482	17.2088	292	0.0851064	0.880435		10	allround	allround	novel	gelding	gelding	4.46246	4.53611	17.0603	2.25584	1.45343	1.45939	2.03234	1.22554	age6_10
gelding	10	allround	novel	.	soft	Lunge left	42	3	-14.6425	9.57531	2.55197	8.95049	22.5	22.5	-24.1248	3.13862	10.2487	4.16005	483	14.8632	293	0.0666667	0.5		10	allround	allround	novel	gelding	gelding	24.1248	10.2487	14.6425	2.55197	2.21623	1.78923	1.95616	1.26392	age6_10
gelding	10	allround	novel	.	hard	Straight line	9	6	-2.42697	12.9925	3.1796	13.0305	7	8	-7.84001	5.34687	10.3692	5.93433	484	4.00001	294	0.4	0.533333		10	allround	allround	novel	gelding	gelding	7.84001	10.3692	2.42697	3.1796	1.67332	1.79447	1.24815	1.33534	age6_10
gelding	15	allround	novel	161	soft	Lunge right	11	24	4.46935	12.9277	11.5683	20.501	0	36	9.96751	3.9997	13.094	5.13961	485	12.4016	307	0.685714	1	161	15	allround	allround	novel	gelding	gelding	9.96751	13.094	4.46935	11.5683	1.77683	1.90225	1.45399	1.84424	age11_15	height155_163
gelding	15	allround	novel	161	hard	Straight line	3	16	12.9062	15.2641	-3.47284	10.1787	3.5	14.5	0.302119	4.33505	13.5779	3.2668	486	13.3653	308	0.842105	0.805556	161	15	allround	allround	novel	gelding	gelding	0.302119	13.5779	12.9062	3.47284	0.741386	1.91959	1.8954	1.36512	age11_15	height155_163
gelding	15	allround	novel	161	soft	Lunge left	29	14	-3.12454	7.83973	7.58074	8.95428	29	32	-6.70599	4.07365	14.7349	5.49236	487	8.19942	309	0.325581	0.52459	161	15	allround	allround	novel	gelding	gelding	6.70599	14.7349	3.12454	7.58074	1.60922	1.95924	1.32953	1.65931	age11_15	height155_163
gelding	15	showjumping	intermediate	167	hard	Straight line	19	10	-7.20592	15.6423	-8.35337	12.0252	25.5	3.5	-6.94845	3.75596	-2.33843	3.51807	488	11.032	319	0.344828	0.12069	167	15	showjump	showjump	intermed	gelding	gelding	6.94845	2.33843	7.20592	8.35337	1.62357	1.23661	1.63841	1.70006	age11_15	height163_171
gelding	15	showjumping	intermediate	167	soft	Lunge left	31	13	-13.503	19.7347	19.1153	14.5216	33	11	-19.6911	5.81092	0.576456	4.9336	489	23.4036	320	0.295455	0.25	167	15	showjump	showjump	intermed	gelding	gelding	19.6911	0.576456	13.503	19.1153	2.10653	0.871348	1.91694	2.09096	age11_15	height163_171
gelding	15	showjumping	intermediate	167	soft	Lunge right	32	12	-7.19099	17.363	-4.91954	20.5118	24.5	19.5	4.86455	4.16071	-17.5784	5.90586	490	8.71276	321	0.272727	0.443182	167	15	showjump	showjump	intermed	gelding	gelding	4.86455	17.5784	7.19099	4.91954	1.48512	2.0476	1.63756	1.4893	age11_15	height163_171
gelding	12	showjumping	novel	.	soft	Lunge right	43	6	-21.9135	19.9875	-10.4733	21.0874	14	34	0.308286	3.70989	9.18099	6.19129	494	24.2877	334	0.122449	0.708333		12	showjump	showjump	novel	gelding	gelding	0.308286	9.18099	21.9135	10.4733	0.745141	1.74069	2.16361	1.79896	age11_15
gelding	12	showjumping	novel	.	hard	Straight line	1	25	15.6185	7.51846	0.837987	11.7572	5	21	1.72157	2.51652	4.43654	3.88725	495	15.6409	335	0.961538	0.807692		12	showjump	showjump	novel	gelding	gelding	1.72157	4.43654	15.6185	0.837987	1.14546	1.45131	1.98797	0.956774	age11_15
gelding	12	showjumping	novel	.	soft	Lunge left	9	23	5.50565	11.3003	-6.61031	8.50144	23.5	22.5	4.34263	3.89961	-6.28567	6.38484	496	8.60281	336	0.71875	0.48913		12	showjump	showjump	novel	gelding	gelding	4.34263	6.28567	5.50565	6.61031	1.44357	1.58339	1.5318	1.60345	age11_15
gelding	25	allround	novel	.	soft	Lunge right	68	0	-26.123	14.004	-7.06592	20.6339	66.5	1.5	-10.004	3.50063	-8.98616	5.17604	497	27.0617	358	0	0.0220588		25	allround	allround	novel	gelding	gelding	10.004	8.98616	26.123	7.06592	1.77846	1.73138	2.26077	1.63039	age15_
gelding	25	allround	novel	.	soft	Lunge left	28	15	-4.35457	12.9627	1.84824	17.3434	9.5	32.5	8.92624	3.38919	1.74973	5.69112	498	4.73056	359	0.348837	0.77381		25	allround	allround	novel	gelding	gelding	8.92624	1.74973	4.35457	1.84824	1.72849	1.15012	1.44456	1.16598	age15_
gelding	25	allround	novel	.	hard	Straight line	19	4	-13.4533	13.3094	-3.87964	14.8114	19	4	-3.54165	2.78128	-5.13658	5.3688	499	14.0016	360	0.173913	0.173913		25	allround	allround	novel	gelding	gelding	3.54165	5.13658	13.4533	3.87964	1.37183	1.50546	1.91517	1.40345	age15_
gelding	7	allround	novel	156	soft	Lunge left	18	30	3.76311	17.621	-14.1836	16.0246	28	23	-8.63069	4.07289	12.74	7.90368	500	14.6744	385	0.625	0.45098	156	7	allround	allround	novel	gelding	gelding	8.63069	12.74	3.76311	14.1836	1.714	1.88926	1.39279	1.94065	age6_10	height155_163
gelding	7	allround	novel	156	soft	Lunge right	21	7	-6.07024	14.211	4.921	11.5114	15	27	11.7328	4.46335	-3.64329	6.78393	501	7.81435	386	0.25	0.642857	156	7	allround	allround	novel	gelding	gelding	11.7328	3.64329	6.07024	4.921	1.85076	1.38157	1.56964	1.48941	age6_10	height155_163
gelding	7	allround	novel	156	hard	Straight line	20	16	-3.23447	13.6097	5.44155	9.24499	2.5	33.5	4.18229	3.30103	8.51454	4.74301	502	6.33027	387	0.444444	0.930556	156	7	allround	allround	novel	gelding	gelding	4.18229	8.51454	3.23447	5.44155	1.43006	1.70821	1.34107	1.52732	age6_10	height155_163
gelding	15	allround	novel	165	hard	Lunge right	6	37	10.475	10.2268	3.4686	9.95829	14	28	4.08599	3.25589	-0.912512	5.77364	635	11.0344	403	0.860465	0.666667	165	15	allround	allround	novel	gelding	gelding	4.08599	0.912512	10.475	3.4686	1.42175	0.977371	1.79903	1.3647	age11_15	height163_171
gelding	15	allround	novel	165	hard	Straight line	0	54	11.9313	5.27616	10.8229	6.45977	31	23	1.01403	2.31093	-2.79	2.53109	636	16.1087	404	1	0.425926	165	15	allround	allround	novel	gelding	gelding	1.01403	2.79	11.9313	10.8229	1.00349	1.29241	1.85854	1.81379	age11_15	height163_171
gelding	15	allround	novel	165	hard	Lunge left	23	9	-3.57294	7.44102	-7.46161	10.8468	10.5	20.5	5.87432	3.20927	-2.51946	5.19939	637	8.27294	405	0.28125	0.66129	165	15	allround	allround	novel	gelding	gelding	5.87432	2.51946	3.57294	7.46161	1.55682	1.25987	1.37485	1.65275	age11_15	height163_171
mare	9	allround	novel	163	soft	Lunge left	16	29	2.5659	8.19471	-2.53795	7.71586	25.5	18.5	2.02939	3.08011	-5.90641	4.65491	71	3.60902	409	0.644444	0.420455	163	9	allround	allround	novel	mare	mare	2.02939	5.90641	2.5659	2.53795	1.19355	1.55895	1.26564	1.26218	age6_10	height163_171
mare	9	allround	novel	163	hard	Straight line	8	41	8.95561	9.17666	0.923446	7.6792	43	6	-1.75774	2.46297	-6.05644	4.08731	72	9.0031	410	0.836735	0.122449	163	9	allround	allround	novel	mare	mare	1.75774	6.05644	8.95561	0.923446	1.15143	1.56875	1.72991	0.980286	age6_10	height163_171
mare	9	allround	novel	163	soft	Lunge right	59	19	-7.14053	13.2377	-6.16854	9.46592	74	4	-7.32299	2.86434	-4.38269	3.61815	73	9.436	411	0.24359	0.0512821	163	9	allround	allround	novel	mare	mare	7.32299	4.38269	7.14053	6.16854	1.64502	1.44689	1.63468	1.57596	age6_10	height163_171
gelding	16	allround	novel	.	soft	Lunge right	50	1	-21.8542	10.2568	-12.5492	9.63693	3.5	47.5	11.9094	2.8542	1.89828	2.11605	347	25.201	436	0.0196078	0.931373		16	allround	allround	novel	gelding	gelding	11.9094	1.89828	21.8542	12.5492	1.85769	1.17379	2.16214	1.88215	age15_
gelding	16	allround	novel	.	soft	Lunge left	4	36	14.7653	12.3069	-0.024089	11.6769	33	7	-11.5328	3.40739	-0.560813	3.75588	348	14.7653	437	0.9	0.175		16	allround	allround	novel	gelding	gelding	11.5328	0.560813	14.7653	0.024089	1.84282	0.865375	1.96025	0.393962	age15_
gelding	16	allround	novel	.	hard	Straight line	15	7	-3.32182	6.67342	-2.48101	5.44321	6.5	14.5	-0.106383	2.13012	3.79322	2.28675	349	4.14607	438	0.318182	0.690476		16	allround	allround	novel	gelding	gelding	0.106383	3.79322	3.32182	2.48101	0.571108	1.39557	1.35003	1.25504	age15_
mare	4	dressage	novel	165	soft	Lunge left	0	64	34.0592	11.5794	10.6863	8.87354	31.5	31.5	-20.964	2.70532	6.16328	2.84761	167	35.6963	442	1	0.5	165	4	dressage	dressage	novel	mare	mare	20.964	6.16328	34.0592	10.6863	2.13978	1.57563	2.41579	1.80803	age_6	height163_171
mare	4	dressage	novel	165	soft	Lunge right	11	56	13.3572	14.2805	17.8214	11.014	11	55	11.0015	2.37502	1.40393	3.38658	168	22.2714	443	0.835821	0.833333	165	4	dressage	dressage	novel	mare	mare	11.0015	1.40393	13.3572	17.8214	1.82122	1.08852	1.91174	2.05464	age_6	height163_171
mare	4	dressage	novel	165	hard	Straight line	1	66	12.6445	7.55503	9.72225	8.16281	28.5	38.5	-2.61916	2.5321	8.26907	2.70072	169	15.9501	444	0.985075	0.574627	165	4	dressage	dressage	novel	mare	mare	2.61916	8.26907	12.6445	9.72225	1.27216	1.69576	1.88571	1.7658	age_6	height163_171
mare	19	allround	novel	161	soft	Lunge left	3	45	7.96053	5.17999	3.27028	6.24274	36.5	11.5	-4.22351	3.55141	-0.620394	2.06351	35	8.60609	457	0.9375	0.239583	161	19	allround	allround	novel	mare	mare	4.22351	0.620394	7.96053	3.27028	1.43357	0.887497	1.67971	1.34476	age15_	height155_163
mare	19	allround	novel	161	soft	Lunge right	30	24	-1.32527	4.22716	-3.10776	5.43199	27.5	25.5	5.66518	3.19011	-10.0833	3.29085	36	3.37853	458	0.444444	0.481132	161	19	allround	allround	novel	mare	mare	5.66518	10.0833	1.32527	3.10776	1.54278	1.78197	1.07294	1.32774	age15_	height155_163
mare	19	allround	novel	161	hard	Straight line	17	21	2.48187	10.464	2.58648	8.41231	29	9	-1.89099	4.90711	-4.48959	4.32726	37	3.58462	459	0.552632	0.236842	161	19	allround	allround	novel	mare	mare	1.89099	4.48959	2.48187	2.58648	1.17266	1.45563	1.25515	1.26817	age15_	height155_163
gelding	4	allround	novel	160	soft	Lunge left	0	55	10.6644	5.5903	-2.29605	5.43589	36.5	18.5	-3.29414	2.67164	0.524058	2.38493	38	10.9088	463	1	0.336364	160	4	allround	allround	novel	gelding	gelding	3.29414	0.524058	10.6644	2.29605	1.34721	0.850834	1.80711	1.23096	age_6	height155_163
gelding	4	allround	novel	160	soft	Lunge right	42	2	-9.09545	5.58884	-14.5468	5.15549	19.5	24.5	8.19942	2.47738	-1.9329	2.05295	39	17.1562	464	0.0454545	0.556818	160	4	allround	allround	novel	gelding	gelding	8.19942	1.9329	9.09545	14.5468	1.69218	1.1791	1.73663	1.95295	age_6	height155_163
gelding	4	allround	novel	160	hard	Straight line	30	4	-6.56221	5.86925	-10.225	7.86167	12	22	2.18043	1.95837	-0.180353	2.4815	40	12.1496	465	0.117647	0.647059	160	4	allround	allround	novel	gelding	gelding	2.18043	0.180353	6.56221	10.225	1.21517	0.651675	1.60053	1.7882	age_6	height155_163
gelding	13	showjumping	novel	.	soft	Lunge left	19	24	3.09762	15.085	-9.57637	12.2362	56	2	-10.4172	4.78168	-7.10939	4.91248	509	10.0649	472	0.55814	0.0344828		13	showjump	showjump	novel	gelding	gelding	10.4172	7.10939	3.09762	9.57637	1.79654	1.63289	1.32665	1.75914	age11_15
gelding	13	showjumping	novel	.	soft	Lunge right	1	41	25.4406	12.319	21.7827	16.8676	5	36	7.16231	4.50063	2.83682	3.48442	510	33.4919	473	0.97619	0.878049		13	showjump	showjump	novel	gelding	gelding	7.16231	2.83682	25.4406	21.7827	1.63592	1.2978	2.24586	2.16037	age11_15
gelding	13	showjumping	novel	.	hard	Straight line	2	25	20.4861	14.9412	6.95792	11.7648	21	6	-2.47655	3.24518	-3.88285	3.97559	511	21.6354	474	0.925926	0.222222		13	showjump	showjump	novel	gelding	gelding	2.47655	3.88285	20.4861	6.95792	1.25447	1.40374	2.12748	1.62413	age11_15
gelding	20	showjumping	novel	.	soft	Lunge left	70	1	-19.0527	9.51325	8.43889	16.8631	19	51	4.09107	3.6824	1.41381	5.69485	512	20.838	481	0.0140845	0.728571		20	showjump	showjump	novel	gelding	gelding	4.09107	1.41381	19.0527	8.43889	1.4222	1.09043	2.08924	1.7044	age15_
gelding	20	showjumping	novel	.	soft	Lunge right	67	19	-13.6034	15.1683	-12.898	19.0994	15.5	70.5	1.2702	3.63076	15.571	5.90442	513	18.746	482	0.22093	0.819767		20	showjump	showjump	novel	gelding	gelding	1.2702	15.571	13.6034	12.898	1.06162	1.98646	1.92049	1.89509	age15_
gelding	20	showjumping	novel	.	hard	Straight line	43	0	-35.153	12.3133	-17.5785	12.3041	3	40	2.41587	2.7787	13.8607	4.35263	514	39.3032	483	0	0.930233		20	showjump	showjump	novel	gelding	gelding	2.41587	13.8607	35.153	17.5785	1.24672	1.92951	2.43495	2.0476	age15_
gelding	16	dressage	intermediate	163	soft	Lunge left	4	17	5.33493	5.42396	-4.45033	4.61975	18.5	2.5	-2.11265	2.35814	-3.96309	1.89504	41	6.94744	487	0.809524	0.119048	163	16	dressage	dressage	intermed	gelding	gelding	2.11265	3.96309	5.33493	4.45033	1.20561	1.41094	1.51979	1.45244	age15_	height163_171
gelding	16	dressage	intermediate	163	soft	Lunge right	25	0	-13.1585	5.69793	0.132193	4.87357	14.5	9.5	3.47296	3.46679	-6.88623	1.96029	42	13.1591	488	0	0.395833	163	16	dressage	dressage	intermed	gelding	gelding	3.47296	6.88623	13.1585	0.132193	1.36513	1.61993	1.90459	0.602979	age15_	height163_171
gelding	16	dressage	intermediate	163	hard	Straight line	58	14	-5.77232	7.7327	-5.48936	8.93208	58	13	-0.773006	2.58981	-8.02616	2.40818	43	7.96572	489	0.194444	0.183099	163	16	dressage	dressage	intermed	gelding	gelding	0.773006	8.02616	5.77232	5.48936	0.937661	1.68317	1.55002	1.53067	age15_	height163_171
gelding	14	allround	novel	165	hard	Straight line	10	36	10.4364	9.64462	7.99815	7.16505	13.5	32.5	1.36944	4.34312	2.61303	2.48616	275	13.1488	493	0.782609	0.706522	165	14	allround	allround	novel	gelding	gelding	1.36944	2.61303	10.4364	7.99815	1.08177	1.27141	1.79737	1.6817	age11_15	height163_171
gelding	14	allround	novel	165	soft	Lunge right	30	71	3.49776	6.25552	2.54076	6.33546	12	89	2.96873	2.54856	2.59283	2.84979	276	4.32317	494	0.70297	0.881188	165	14	allround	allround	novel	gelding	gelding	2.96873	2.59283	3.49776	2.54076	1.31263	1.26895	1.36756	1.26253	age11_15	height163_171
gelding	14	allround	novel	165	soft	Lunge left	38	40	1.26051	7.05099	-0.816589	7.14903	27.5	50.5	-1.52872	3.25527	7.24105	3.36678	277	1.5019	495	0.512821	0.647436	165	14	allround	allround	novel	gelding	gelding	1.52872	7.24105	1.26051	0.816589	1.11194	1.6404	1.05959	0.950607	age11_15	height163_171
mare	4	allround	novel	164	soft	Lunge left	9	64	15.1409	16.0699	7.96909	14.5822	55.5	17.5	-16.424	2.86331	-0.773771	3.75281	653	17.1101	496	0.876712	0.239726	164	4	allround	allround	novel	mare	mare	16.424	0.773771	15.1409	7.96909	2.01312	0.937893	1.9726	1.68017	age_6	height163_171
mare	4	allround	novel	164	soft	Lunge right	50	0	-34.9986	21.9279	3.96717	22.549	7	42	8.80908	3.19919	1.52396	2.48683	654	35.2228	497	0	0.857143	164	4	allround	allround	novel	mare	mare	8.80908	1.52396	34.9986	3.96717	1.72279	1.11107	2.43228	1.4113	age_6	height163_171
mare	4	allround	novel	164	hard	Straight line	22	4	-11.8338	8.05985	-2.50897	6.51764	12	14	-2.74518	3.95757	2.68292	5.69638	655	12.0968	498	0.153846	0.538462	164	4	allround	allround	novel	mare	mare	2.74518	2.68292	11.8338	2.50897	1.28719	1.27983	1.85473	1.25856	age_6	height163_171
mare	12	dressage	advanced	160	soft	Lunge left	13	61	11.384	12.9722	-16.8981	10.4849	31.5	42.5	-3.19746	5.24639	4.54542	4.52156	155	20.375	511	0.824324	0.574324	160	12	dressage	dressage	advanced	mare	mare	3.19746	4.54542	11.384	16.8981	1.33722	1.46014	1.83685	2.02749	age11_15	height155_163
mare	12	dressage	advanced	160	hard	Straight line	17	4	-8.59667	15.1381	-23.6065	14.5715	3.5	17.5	11.148	7.91509	2.49871	4.95129	156	25.1231	512	0.190476	0.833333	160	12	dressage	dressage	advanced	mare	mare	11.148	2.49871	8.59667	23.6065	1.82726	1.25727	1.71231	2.20424	age11_15	height155_163
mare	12	dressage	advanced	160	soft	Lunge right	99	0	-23.9472	14.1758	-1.33744	11.355	38	61	25.0909	5.48591	-5.32673	6.51516	157	23.9845	513	0	0.616162	160	12	dressage	dressage	advanced	mare	mare	25.0909	5.32673	23.9472	1.33744	2.2381	1.5192	2.21215	1.0754	age11_15	height155_163
gelding	15	allround	novel	172	hard	Straight line	4	12	23.7727	48.0582	9.58315	46.5497	12	4	-0.287706	6.38239	-7.33675	4.85602	518	25.6315	514	0.75	0.25	172	15	allround	allround	novel	gelding	gelding	0.287706	7.33675	23.7727	9.58315	0.732381	1.6458	2.2081	1.75945	age11_15	height171_
gelding	15	allround	novel	172	soft	Lunge left	18	25	1.83741	10.0101	-3.67542	11.5501	41	21	-1.19495	4.329	-2.59827	4.14906	519	4.10911	515	0.581395	0.33871	172	15	allround	allround	novel	gelding	gelding	1.19495	2.59827	1.83741	3.67542	1.04553	1.26961	1.16426	1.38461	age11_15	height171_
gelding	15	allround	novel	172	soft	Lunge right	16	24	4.50391	18.0621	-17.6207	16.7789	24.5	14.5	2.49082	2.82153	-10.8117	5.34035	520	18.1872	516	0.6	0.371795	172	15	allround	allround	novel	gelding	gelding	2.49082	10.8117	4.50391	17.6207	1.25628	1.81332	1.45679	2.04883	age11_15	height171_
mare	14	allround	novel	169	hard	Straight line	6	17	10.4902	18.7422	9.30696	18.9625	11	12	4.18874	3.12713	-4.8794	5.72957	521	14.0237	526	0.73913	0.521739	169	14	allround	allround	novel	mare	mare	4.18874	4.8794	10.4902	9.30696	1.43061	1.48625	1.79968	1.74663	age11_15	height163_171
mare	14	allround	novel	169	soft	Lunge right	50	16	-8.51885	10.606	8.69167	8.99083	24	42	2.81691	3.15742	0.0834891	3.69195	522	12.1703	527	0.242424	0.636364	169	14	allround	allround	novel	mare	mare	2.81691	0.0834891	8.51885	8.69167	1.29552	0.537536	1.70842	1.71702	age11_15	height163_171
mare	14	allround	novel	169	soft	Lunge left	29	22	-3.98708	12.3854	-4.90208	12.6974	12.5	37.5	3.6132	3.48001	1.06866	4.24009	523	6.3188	528	0.431373	0.75	169	14	allround	allround	novel	mare	mare	3.6132	1.06866	3.98708	4.90208	1.37871	1.01674	1.41307	1.48797	age11_15	height163_171
gelding	6	allround	novel	182	hard	Straight line	0	38	21.0857	15.0526	6.95825	9.20089	27	11	0.417255	3.93276	-5.09098	4.02794	365	22.2041	541	1	0.289474	182	6	allround	allround	novel	gelding	gelding	0.417255	5.09098	21.0857	6.95825	0.803712	1.50211	2.14288	1.62415	age6_10	height171_
gelding	6	allround	novel	182	soft	Lunge left	5	29	8.63523	10.1133	-13.3779	9.80608	19	15	2.51566	6.59401	-3.22668	6.90809	366	15.9228	542	0.852941	0.441176	182	6	allround	allround	novel	gelding	gelding	2.51566	3.22668	8.63523	13.3779	1.2594	1.34026	1.71423	1.91248	age6_10	height171_
gelding	6	allround	novel	182	soft	Lunge right	37	12	-8.47678	13.0617	5.6889	9.12536	35.5	13.5	-2.25791	6.70715	-2.41164	4.25694	367	10.2088	543	0.244898	0.27551	182	6	allround	allround	novel	gelding	gelding	2.25791	2.41164	8.47678	5.6889	1.22582	1.24617	1.70631	1.54439	age6_10	height171_
stallion	4	dressage	novel	166	soft	Lunge left	11	17	1.42063	5.32914	-4.03001	9.33614	27	11	-9.1206	4.56889	1.34785	4.39447	176	4.27307	544	0.607143	0.289474	166	4	dressage	dressage	novel	stallion	gelding	9.1206	1.34785	1.42063	4.03001	1.73782	1.07748	1.09174	1.41686	age_6	height163_171
stallion	4	dressage	novel	166	hard	Straight line	27	5	-10.0047	8.23618	2.23925	16.2054	21.5	10.5	-0.656627	2.67824	-1.23085	4.31165	177	10.2523	545	0.15625	0.328125	166	4	dressage	dressage	novel	stallion	gelding	0.656627	1.23085	10.0047	2.23925	0.900181	1.0533	1.77849	1.22328	age_6	height163_171
stallion	4	dressage	novel	166	soft	Lunge right	46	1	-18.8582	10.297	1.17045	10.8407	6.5	40.5	11.0608	3.17069	3.21837	5.092	178	18.8945	546	0.0212766	0.861702	166	4	dressage	dressage	novel	stallion	gelding	11.0608	3.21837	18.8582	1.17045	1.82367	1.3394	2.08389	1.04013	age_6	height163_171
gelding	19	allround	novel	163	hard	Straight line	49	14	-6.97721	10.3837	-12.986	10.0731	35	28	-0.999366	3.21036	-0.121405	4.24205	296	14.7417	550	0.222222	0.444444	163	19	allround	allround	novel	gelding	gelding	0.999366	0.121405	6.97721	12.986	0.999842	0.590281	1.62525	1.89832	age15_	height163_171
gelding	19	allround	novel	163	soft	Lunge left	75	27	-7.44004	13.6313	-5.3236	11.8386	89.5	12.5	-6.92144	3.8812	-3.40555	4.81074	297	9.14849	551	0.264706	0.122549	163	19	allround	allround	novel	gelding	gelding	6.92144	3.40555	7.44004	5.3236	1.62199	1.35846	1.65156	1.51898	age15_	height163_171
gelding	19	allround	novel	163	soft	Lunge right	59	43	-0.60338	8.82643	-19.9407	10.5784	58.5	42.5	1.21408	3.37331	-3.68252	4.17447	298	19.9499	552	0.421569	0.420792	163	19	allround	allround	novel	gelding	gelding	1.21408	3.68252	0.60338	19.9407	1.04969	1.38528	0.881349	2.11317	age15_	height163_171
gelding	4	dressage	novel	168	soft	Lunge left	10	25	11.8191	27.1167	24.0539	14.2598	32.5	2.5	-9.31225	3.84379	-4.61969	4.35705	281	26.8008	553	0.714286	0.0714286	168	4	dressage	dressage	novel	gelding	gelding	9.31225	4.61969	11.8191	24.0539	1.74688	1.46607	1.85416	2.21461	age_6	height163_171
gelding	4	dressage	novel	168	hard	Straight line	11	26	12.7396	34.3792	20.6146	26.0486	24.5	11.5	-5.06783	2.39979	1.08216	4.87157	282	24.2334	554	0.702703	0.319444	168	4	dressage	dressage	novel	gelding	gelding	5.06783	1.08216	12.7396	20.6146	1.50039	1.01993	1.88925	2.1308	age_6	height163_171
gelding	4	dressage	novel	168	soft	Lunge right	36	0	-23.4092	8.1734	-0.046381	6.29326	18	18	-3.97244	3.20354	6.483	4.62884	283	23.4093	555	0	0.5	168	4	dressage	dressage	novel	gelding	gelding	3.97244	6.483	23.4092	0.046381	1.41177	1.59567	2.19962	0.464072	age_6	height163_171
mare	4	dressage	novel	160	soft	Lunge left	7	50	12.9252	10.719	6.50423	8.8838	11.5	45.5	0.835258	3.48347	11.2901	4.09312	368	14.4695	559	0.877193	0.798246	160	4	dressage	dressage	novel	mare	mare	0.835258	11.2901	12.9252	6.50423	0.955994	1.83305	1.89609	1.59698	age_6	height155_163
mare	4	dressage	novel	160	soft	Lunge right	44	22	-3.24926	25.9278	-6.86382	25.4951	0	66	17.5309	3.93493	10.529	4.34478	369	7.59406	560	0.333333	1	160	4	dressage	dressage	novel	mare	mare	17.5309	10.529	3.24926	6.86382	2.04621	1.80134	1.3426	1.61861	age_6	height155_163
mare	4	dressage	novel	160	hard	Straight line	8	26	6.14702	13.8682	3.28871	12.2203	0	34	10.3427	3.46296	12.4414	7.43543	370	6.97147	561	0.764706	1	160	4	dressage	dressage	novel	mare	mare	10.3427	12.4414	6.14702	3.28871	1.79332	1.87809	1.57458	1.34665	age_6	height155_163
mare	6	dressage	novel	168	soft	Lunge right	20	6	-7.81985	9.52254	6.76911	10.5808	8.5	17.5	16.0895	3.31364	-2.8186	5.67691	236	10.3427	577	0.230769	0.673077	168	6	dressage	dressage	novel	mare	mare	16.0895	2.8186	7.81985	6.76911	2.00279	1.29571	1.67224	1.61299	age6_10	height163_171
mare	6	dressage	novel	168	hard	Straight line	15	14	-1.41859	13.3875	-0.57644	12.5899	7.5	27.5	5.86735	4.76495	1.57436	5.41797	237	1.53124	578	0.482759	0.785714	168	6	dressage	dressage	novel	mare	mare	5.86735	1.57436	1.41859	0.57644	1.55636	1.12015	1.09135	0.871342	age6_10	height163_171
mare	6	dressage	novel	168	soft	Lunge left	52	21	-7.54497	12.8708	-7.48993	13.9424	19	54	0.612392	4.08977	12.7277	8.92322	238	10.6314	579	0.287671	0.739726	168	6	dressage	dressage	novel	mare	mare	0.612392	12.7277	7.54497	7.48993	0.884621	1.88881	1.65735	1.65432	age6_10	height163_171
gelding	13	allround	novel	166	hard	Straight line	12	15	3.73811	14.3658	-3.48062	12.7834	16.5	10.5	-5.03783	3.7104	1.78862	4.31712	209	5.10766	580	0.555556	0.388889	166	13	allround	allround	novel	gelding	gelding	5.03783	1.78862	3.73811	3.48062	1.49817	1.15646	1.39047	1.36589	age11_15	height163_171
gelding	13	allround	novel	166	soft	Lunge right	16	28	1.20363	6.24956	-6.91717	6.52372	26.5	16.5	-3.38008	3.02035	0.682252	5.34379	210	7.0211	581	0.636364	0.383721	166	13	allround	allround	novel	gelding	gelding	3.38008	0.682252	1.20363	6.91717	1.35591	0.908837	1.04743	1.62174	age11_15	height163_171
gelding	13	allround	novel	166	soft	Lunge left	4	35	11.3171	7.29235	-5.49052	7.65872	30	8	-7.8414	3.05852	-1.2585	3.62409	211	12.5786	582	0.897436	0.210526	166	13	allround	allround	novel	gelding	gelding	7.8414	1.2585	11.3171	5.49052	1.67339	1.05916	1.83415	1.53075	age11_15	height163_171
gelding	17	dressage	intermediate	160	soft	Lunge left	4	39	14.9379	12.9573	8.66985	13.5978	22.5	19.5	-14.7879	4.30254	7.38219	5.2485	530	17.2715	592	0.906977	0.464286	160	17	dressage	dressage	intermed	gelding	gelding	14.7879	7.38219	14.9379	8.66985	1.961	1.64834	1.96595	1.71594	age15_	height155_163
gelding	17	dressage	intermediate	160	soft	Lunge right	46	0	-25.9761	10.6566	-22.1426	14.2979	22.5	22.5	8.80526	5.01035	-9.28874	6.2602	531	34.1329	593	0	0.5	160	17	dressage	dressage	intermed	gelding	gelding	8.80526	9.28874	25.9761	22.1426	1.7226	1.74578	2.25758	2.16924	age15_	height155_163
gelding	17	dressage	intermediate	160	hard	Straight line	16	7	-10.5875	15.1746	-9.14297	16.6915	18	5	-5.92043	3.46639	-0.371423	5.40071	532	13.9889	594	0.304348	0.217391	160	17	dressage	dressage	intermed	gelding	gelding	5.92043	0.371423	10.5875	9.14297	1.55987	0.780669	1.80384	1.73889	age15_	height155_163
gelding	12	dressage	intermediate	169	soft	Lunge right	68	1	-16.6563	9.6118	-10.1317	10.3985	21.5	46.5	17.2673	3.93555	-0.707221	3.11778	227	19.4957	607	0.0144928	0.683824	169	12	dressage	dressage	intermed	gelding	gelding	17.2673	0.707221	16.6563	10.1317	2.03848	0.917041	2.0202	1.78411	age11_15	height163_171
gelding	12	dressage	intermediate	169	hard	Straight line	24	24	-0.209995	13.799	-4.95037	10.2843	29	19	1.6212	4.37842	-3.24811	3.24192	228	4.95482	608	0.5	0.395833	169	12	dressage	dressage	intermed	gelding	gelding	1.6212	3.24811	0.209995	4.95037	1.12839	1.34248	0.676943	1.49162	age11_15	height163_171
gelding	12	dressage	intermediate	169	soft	Lunge left	11	54	10.1943	13.2935	-15.8542	14.2413	55	8	-10.6526	3.52016	-1.85144	4.90605	229	18.8489	609	0.830769	0.126984	169	12	dressage	dressage	intermed	gelding	gelding	10.6526	1.85144	10.1943	15.8542	1.80661	1.16648	1.78686	1.99543	age11_15	height163_171
mare	11	showjumping	intermediate	.	soft	Lunge left	0	43	35.958	11.9221	-8.23535	12.9304	26	17	-7.76555	4.69043	3.58898	5.03707	533	36.889	628	1	0.395349		11	showjump	showjump	intermed	mare	mare	7.76555	3.58898	35.958	8.23535	1.66933	1.37639	2.44878	1.69403	age11_15
mare	11	showjumping	intermediate	.	soft	Lunge right	2	3	6.95742	11.9328	2.7358	11.9329	2	3	1.1319	3.02932	-0.233808	4.61314	534	7.47598	629	0.6	0.6		11	showjump	showjump	intermed	mare	mare	1.1319	0.233808	6.95742	2.7358	1.03146	0.695368	1.6241	1.28609	age11_15
mare	11	showjumping	intermediate	.	hard	Straight line	0	33	23.7881	10.2327	8.61489	9.5065	16.5	16.5	-1.57739	2.2021	2.11139	3.28384	535	25.3	630	1	0.5		11	showjump	showjump	intermed	mare	mare	1.57739	2.11139	23.7881	8.61489	1.12069	1.20543	2.20846	1.71322	age11_15
gelding	12	dressage	intermediate	172	soft	Lunge right	38	5	-26.7416	19.2046	22.5501	22.3996	36.5	5.5	-8.42656	5.41253	-3.60464	4.16844	536	34.9803	640	0.116279	0.130952	172	12	dressage	dressage	intermed	gelding	gelding	8.42656	3.60464	26.7416	22.5501	1.70378	1.37789	2.27403	2.17915	age11_15	height171_
gelding	12	dressage	intermediate	172	soft	Lunge left	36	8	-13.2612	12.4776	-10.9505	21.5305	43	1	-16.297	3.9713	-9.11661	4.10967	537	17.1981	641	0.181818	0.0227273	172	12	dressage	dressage	intermed	gelding	gelding	16.297	9.11661	13.2612	10.9505	2.00922	1.73763	1.9083	1.81911	age11_15	height171_
gelding	12	dressage	intermediate	172	hard	Straight line	4	22	10.1219	9.8415	17.4302	11.9734	25.5	0.5	-10.0286	2.8671	-5.96197	3.5683	538	20.156	642	0.846154	0.0192308	172	12	dressage	dressage	intermed	gelding	gelding	10.0286	5.96197	10.1219	17.4302	1.77955	1.5626	1.78367	2.04327	age11_15	height171_
gelding	8	dressage	intermediate	167	soft	Lunge left	3	45	35.7726	22.8287	9.85805	20.4179	32	16	0.85624	7.33013	-7.50582	6.37958	233	37.1061	643	0.9375	0.333333	167	8	dressage	dressage	intermed	gelding	gelding	0.85624	7.50582	35.7726	9.85805	0.961942	1.6552	2.44561	1.77193	age6_10	height163_171
gelding	8	dressage	intermediate	167	soft	Lunge right	51	1	-50.5968	28.4052	-31.1732	34.7239	6.5	45.5	21.4133	6.5889	5.26556	8.87384	234	59.429	644	0.0192308	0.875	167	8	dressage	dressage	intermed	gelding	gelding	21.4133	5.26556	50.5968	31.1732	2.15115	1.51482	2.66705	2.3629	age6_10	height163_171
gelding	8	dressage	intermediate	167	hard	Straight line	8	2	-7.15748	14.6957	-15.4023	10.367	3	7	2.85804	9.93166	4.24294	9.54085	235	16.9841	645	0.2	0.7	167	8	dressage	dressage	intermed	gelding	gelding	2.85804	4.24294	7.15748	15.4023	1.30022	1.43521	1.63565	1.98106	age6_10	height163_171
gelding	7	showjumping	novel	.	hard	Straight line	15	13	1.00806	14.8182	3.13264	13.6445	14.5	13.5	-3.64384	3.38734	4.4826	5.90503	539	3.29084	664	0.464286	0.482143		7	showjump	showjump	novel	gelding	gelding	3.64384	4.4826	1.00806	3.13264	1.38162	1.45506	1.00201	1.33039	age6_10
gelding	7	showjumping	novel	.	soft	Lunge right	30	12	-7.65722	13.9398	-39.2375	14.1599	1.5	39.5	8.02961	2.60658	4.62584	3.84599	540	39.9777	665	0.285714	0.963415		7	showjump	showjump	novel	gelding	gelding	8.02961	4.62584	7.65722	39.2375	1.68335	1.46655	1.66348	2.5028	age6_10
gelding	7	showjumping	novel	.	soft	Lunge left	15	24	8.31281	16.5491	7.19557	14.7611	23.5	15.5	-15.4462	4.48325	2.47913	3.67741	541	10.9945	666	0.615385	0.397436		7	showjump	showjump	novel	gelding	gelding	15.4462	2.47913	8.31281	7.19557	1.98246	1.2548	1.698	1.63782	age6_10
